# Supplementary material for: Magnesium complexes supported by a dianionic double layer nitrogen–phosphorus ligand: a synthesis and reactivity study
Source: Royal Society of Chemistry journal article supplement (doi:10.1039/d3dt01657a), 2023-01-01
Supplement: d3dt01657a1.pdf [file d3dt01657a1.pdf]

*Supporting Information for*

**Magnesium Complexes Supported by Dianionic Double Layer  
Nitrogen-Phosphorus Ligand: Synthesis and Reactivity Study**

Yafei Li,<sup>a</sup> Pengfei Chen,<sup>a</sup> Qin Zhu,<sup>b,\*</sup> and Congqing Zhu<sup>a,\*</sup>

<sup>a</sup> *State Key Laboratory of Coordination Chemistry, Jiangsu Key Laboratory of Advanced Organic Materials, School of Chemistry and Chemical Engineering, Nanjing University, Nanjing 210093, China.*

<sup>b</sup> *Key Laboratory for Organic Electronics & Information Displays (KLOEID) and Institute of Advanced Materials (IAM), SICAM, Nanjing University of Posts & Telecommunications, Nanjing 210023, China*

\*Correspondence and requests for materials should be addressed to C.Z. (E-mail: zcq@nju.edu.cn) or Q.Z. (iamqzhu@njupt.edu.cn).

**Context**

|                                                      |    |
|------------------------------------------------------|----|
| 1. NMR spectra-----                                  | 2  |
| 2. Crystal data and structure refinement-----        | 11 |
| 3. Molecular structure, bond lengths and angles----- | 14 |
| 4. Cartesian coordinates-----                        | 21 |

# 1. NMR spectra

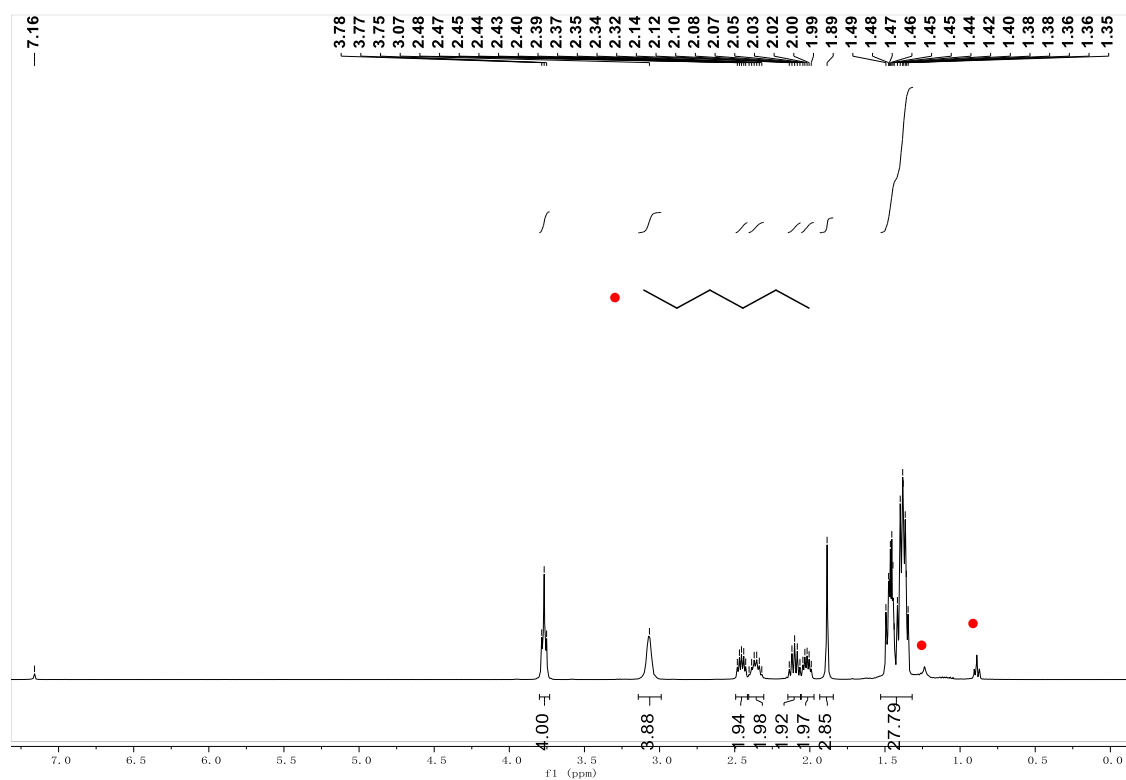

Figure S1  $^1\text{H}$  NMR spectrum of complex **1** in  $\text{C}_6\text{D}_6$ .

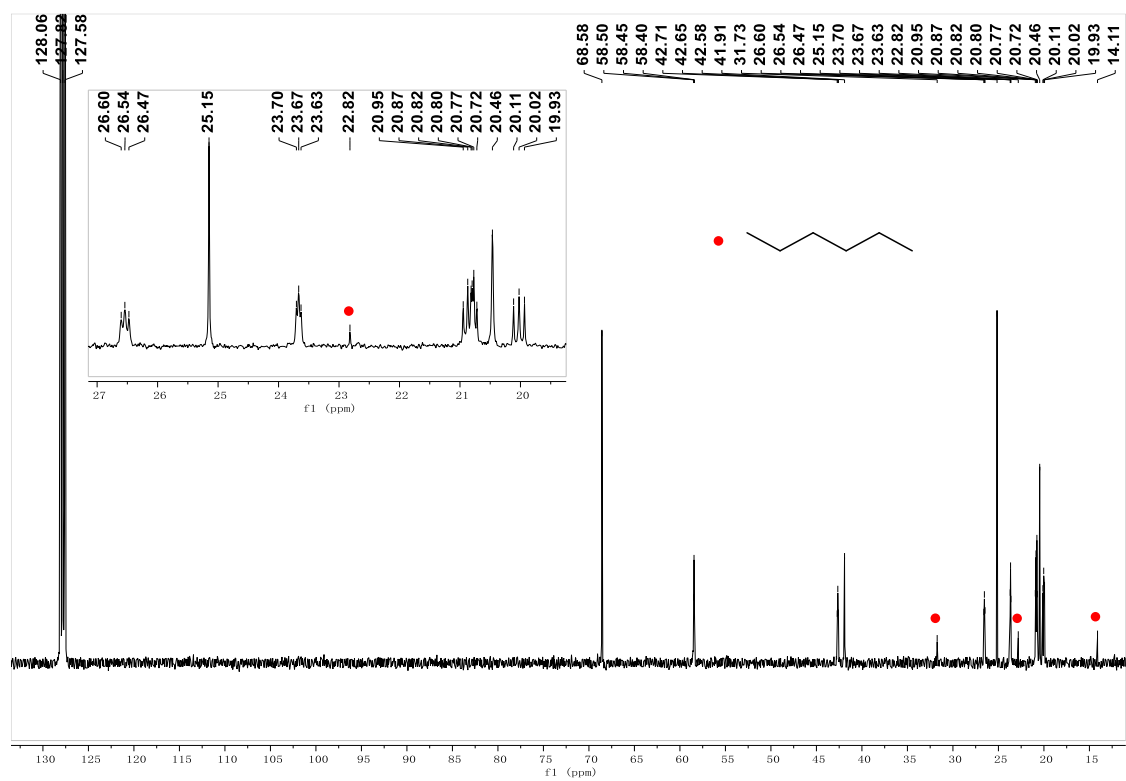

Figure S2  $^{13}\text{C}\{^1\text{H}\}$  NMR spectrum of complex **1** ( $\text{C}_6\text{D}_6$ )

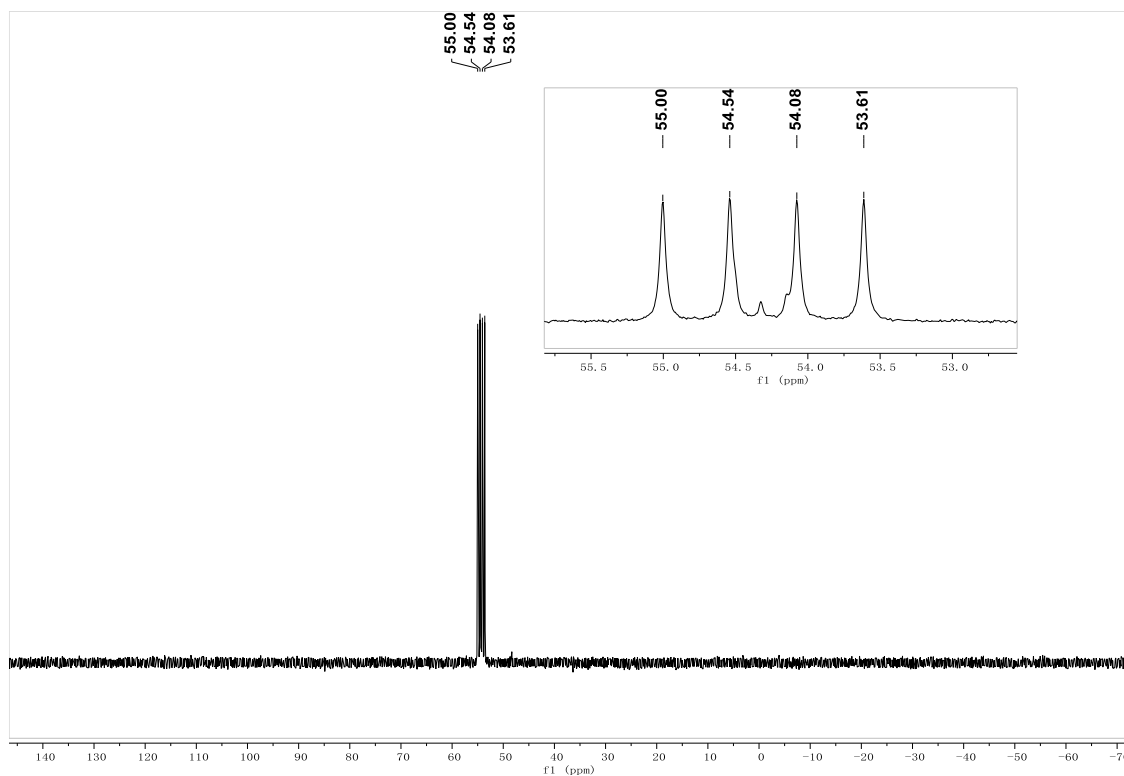

Figure S3  $^{31}\text{P}\{^1\text{H}\}$  NMR spectrum of complex 1 ( $\text{C}_6\text{D}_6$ )

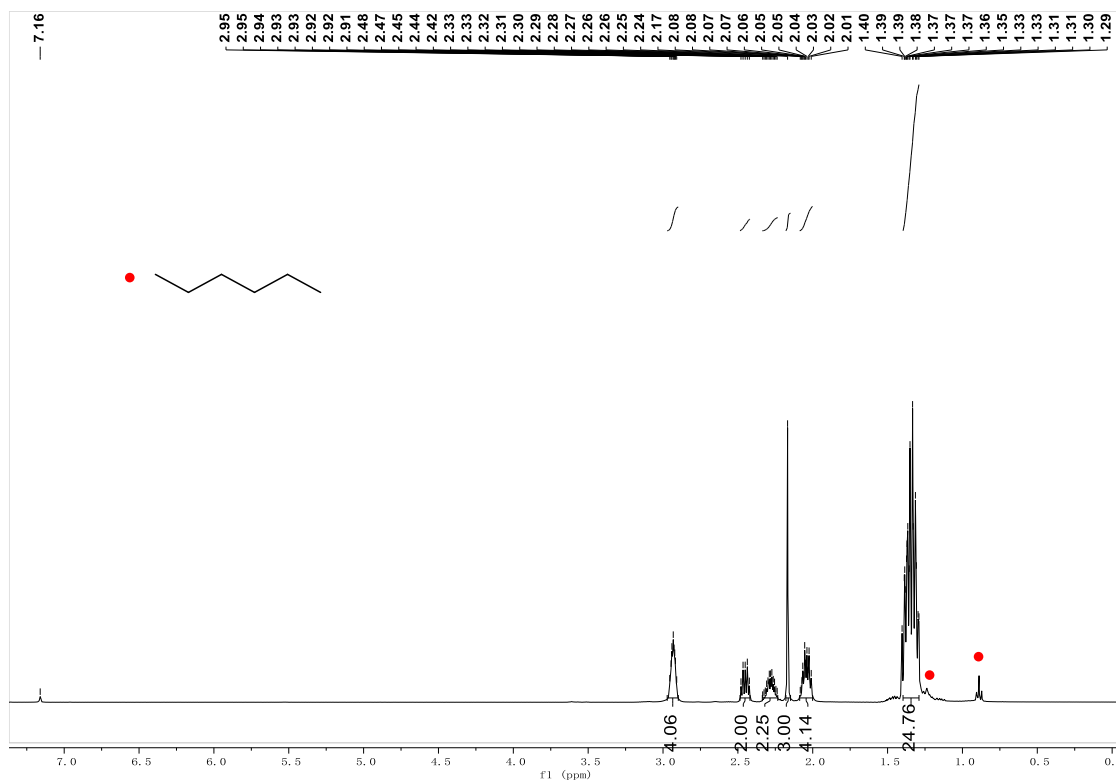

Figure S4  $^1\text{H}$  NMR spectrum of complex 2 ( $\text{C}_6\text{D}_6$ )

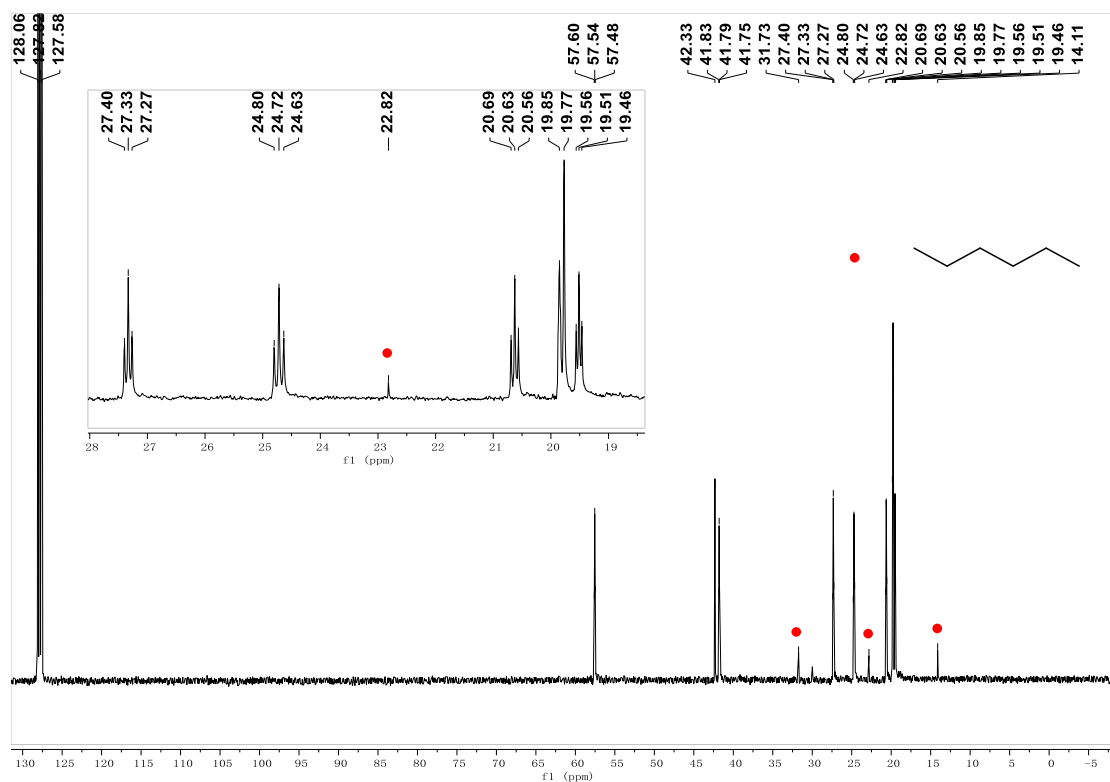

Figure S5  $^{13}\text{C}\{^1\text{H}\}$  NMR spectrum of complex 2 ( $\text{C}_6\text{D}_6$ )

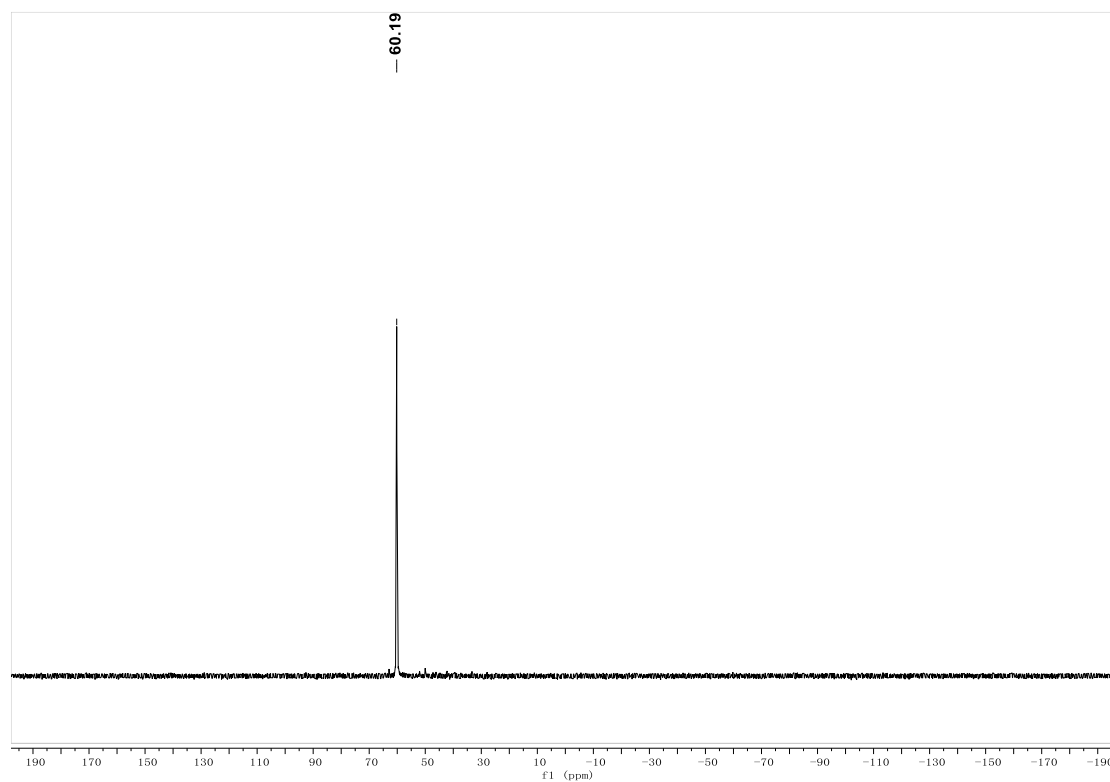

Figure S6  $^{31}\text{P}\{^1\text{H}\}$  NMR spectrum of complex 2 ( $\text{C}_6\text{D}_6$ )

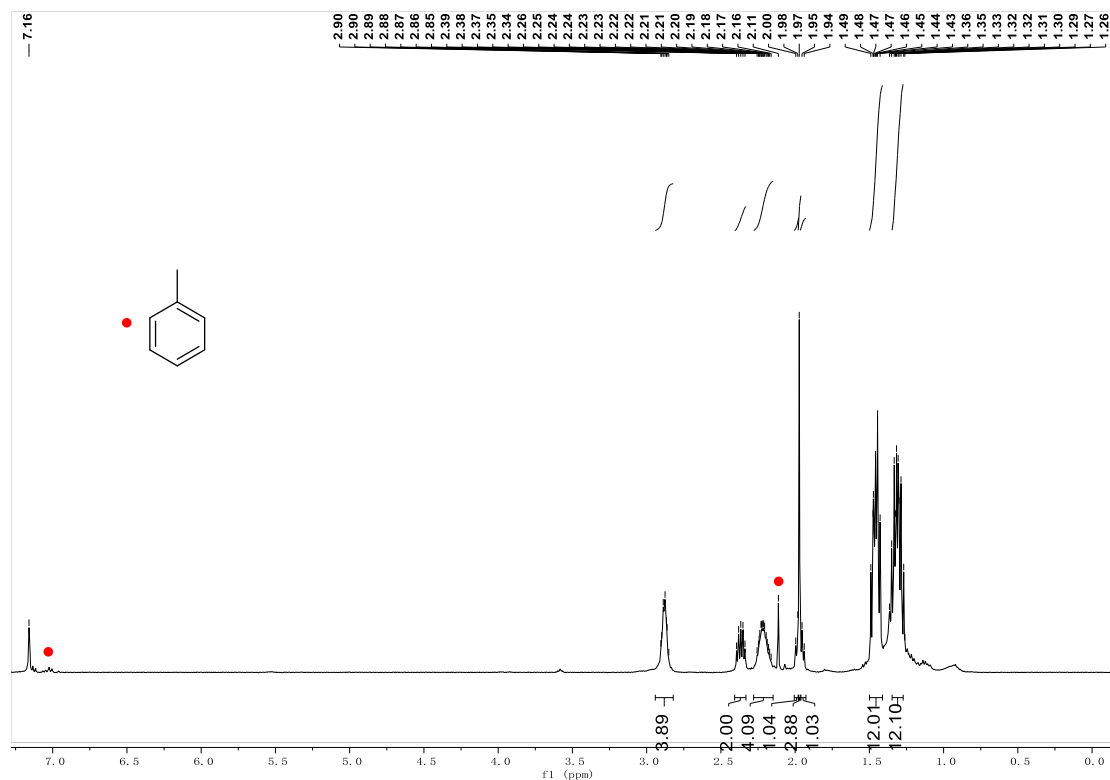

Figure S7  $^1\text{H}$  NMR spectrum of complex **3** ( $\text{C}_6\text{D}_6$ )

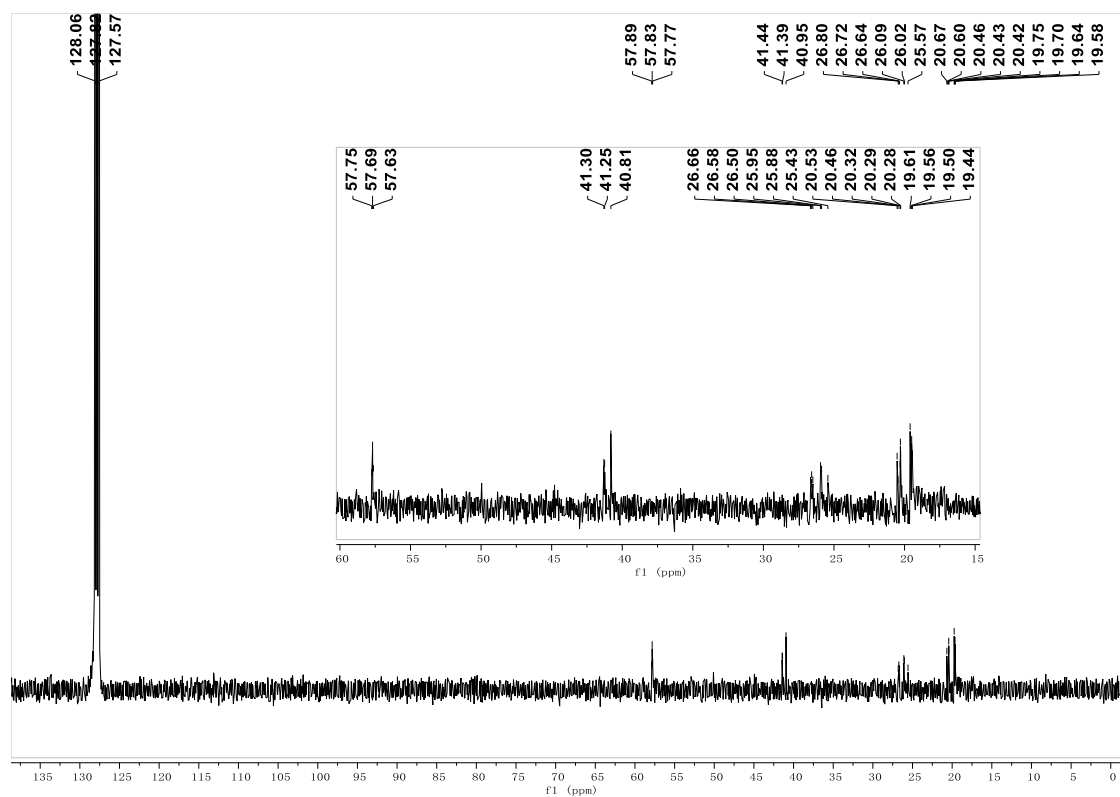

Figure S8  $^{13}\text{C}\{^1\text{H}\}$  NMR spectrum of complex **3** ( $\text{C}_6\text{D}_6$ )

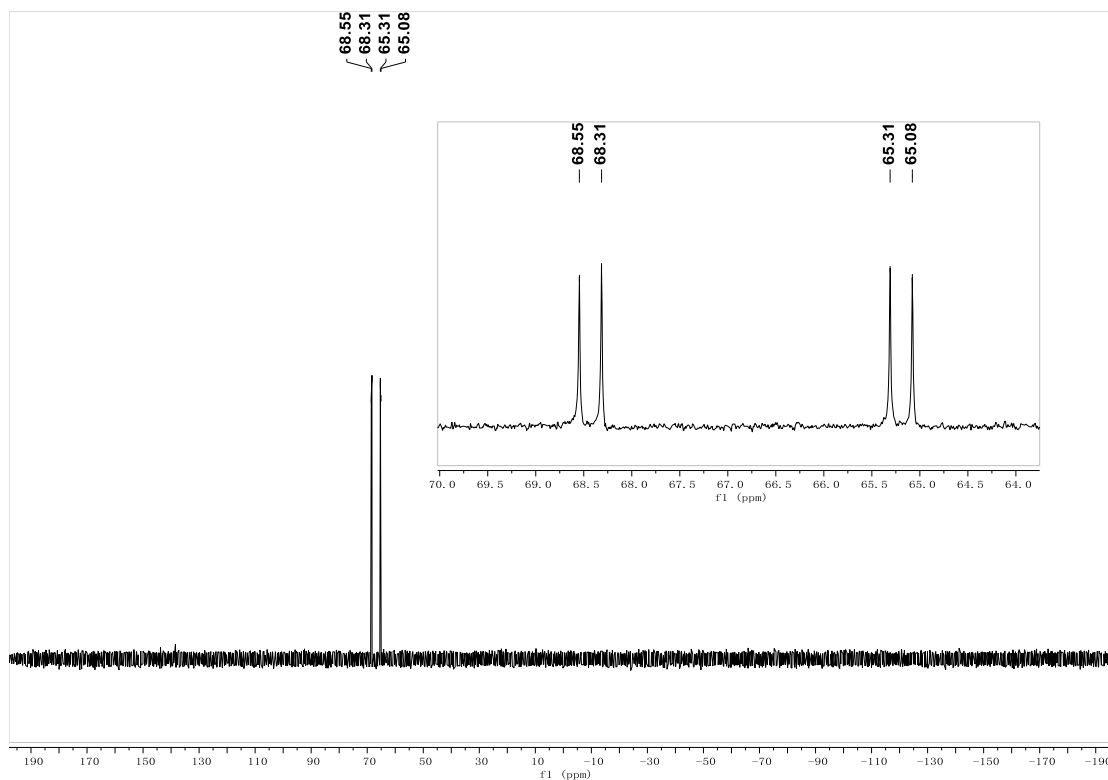

Figure S9 <sup>31</sup>P{<sup>1</sup>H} NMR spectrum of complex 3 (C<sub>6</sub>D<sub>6</sub>)

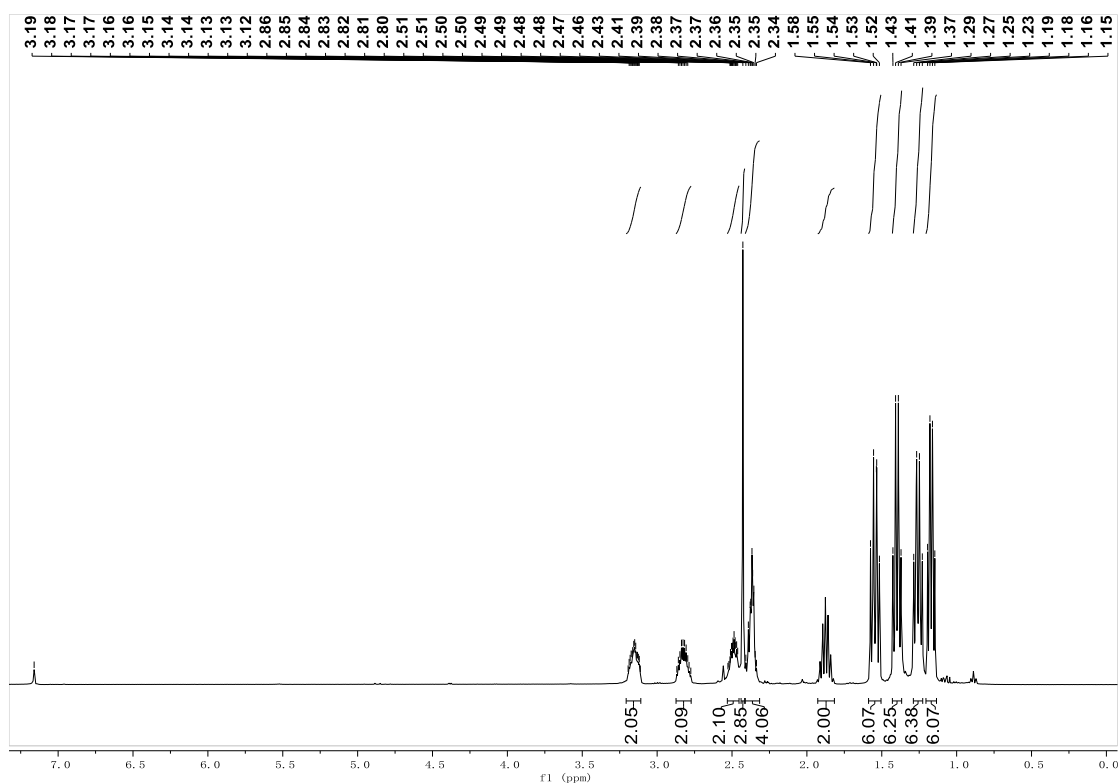

Figure S10 <sup>1</sup>H NMR spectrum of complex 4 (C<sub>6</sub>D<sub>6</sub>)

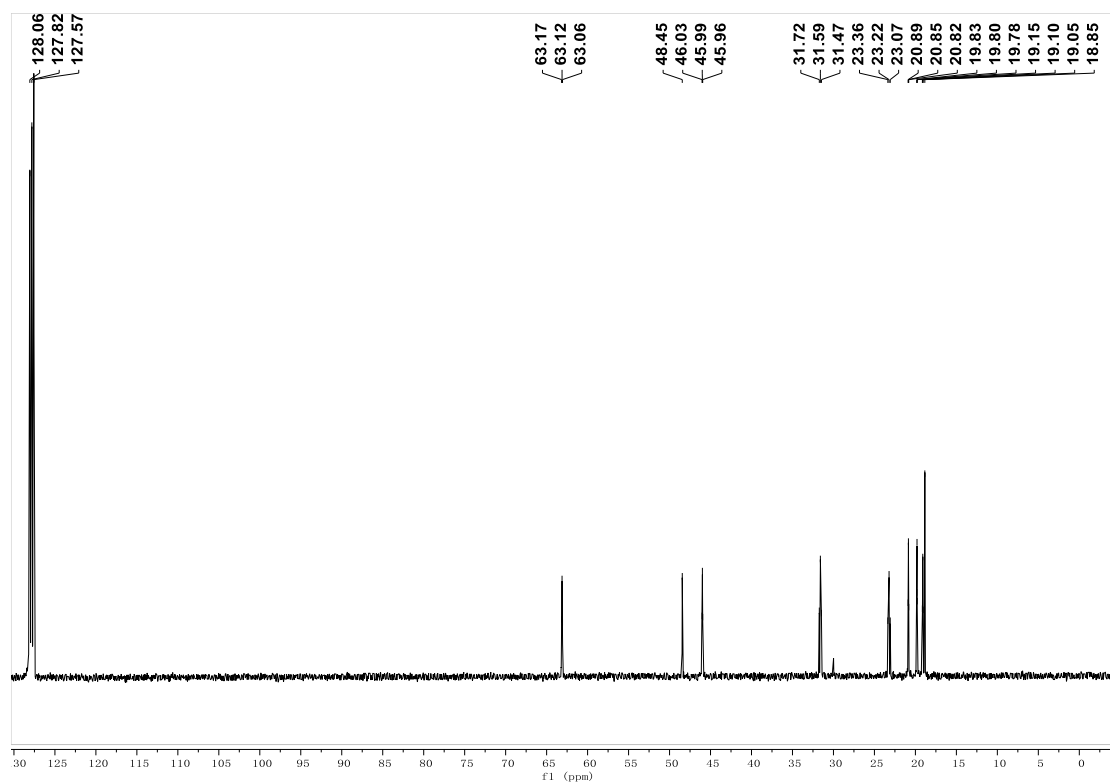

Figure S11  $^{13}\text{C}\{^1\text{H}\}$  NMR spectrum of complex 4 ( $\text{C}_6\text{D}_6$ )

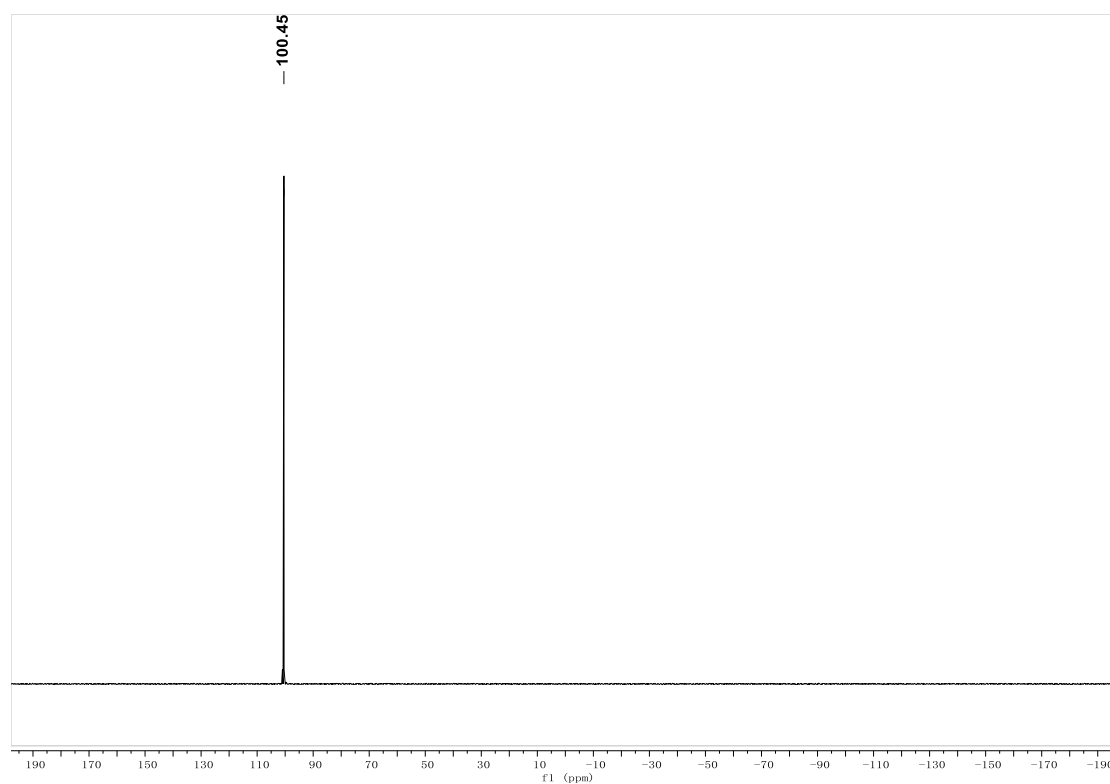

Figure S12  $^{31}\text{P}\{^1\text{H}\}$  NMR spectrum of complex 4 ( $\text{C}_6\text{D}_6$ )

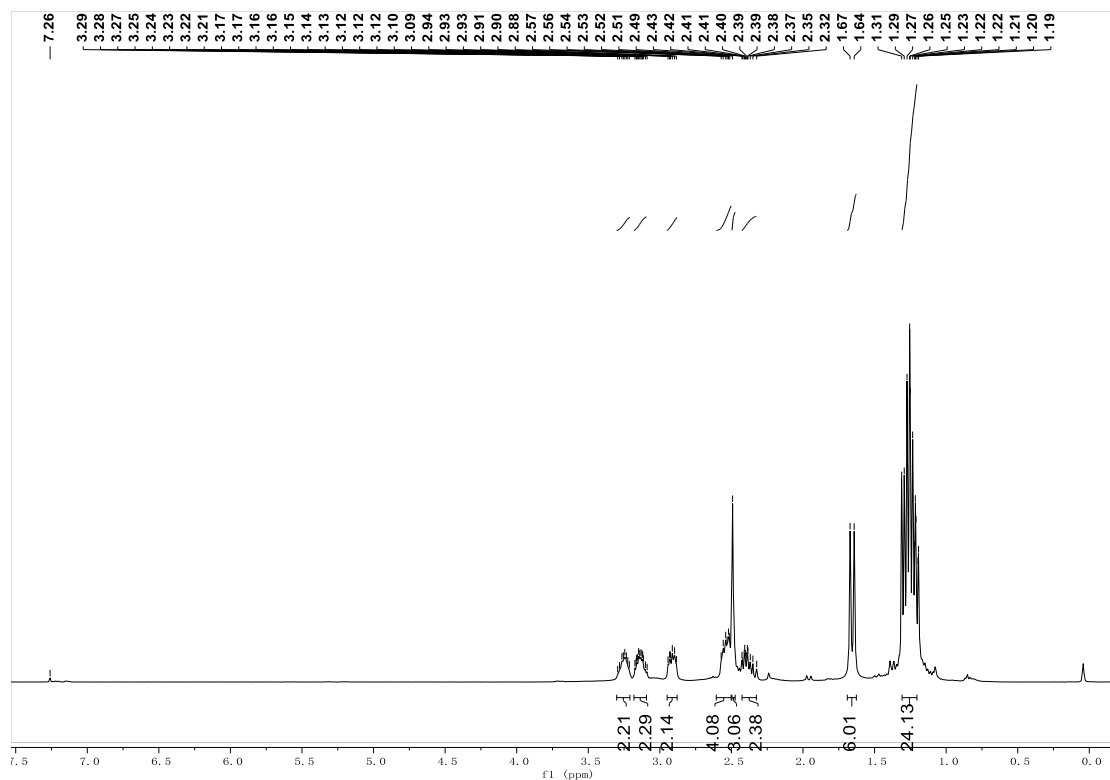

Figure S13  $^1\text{H}$  NMR spectrum of complex **5** ( $\text{CDCl}_3$ )

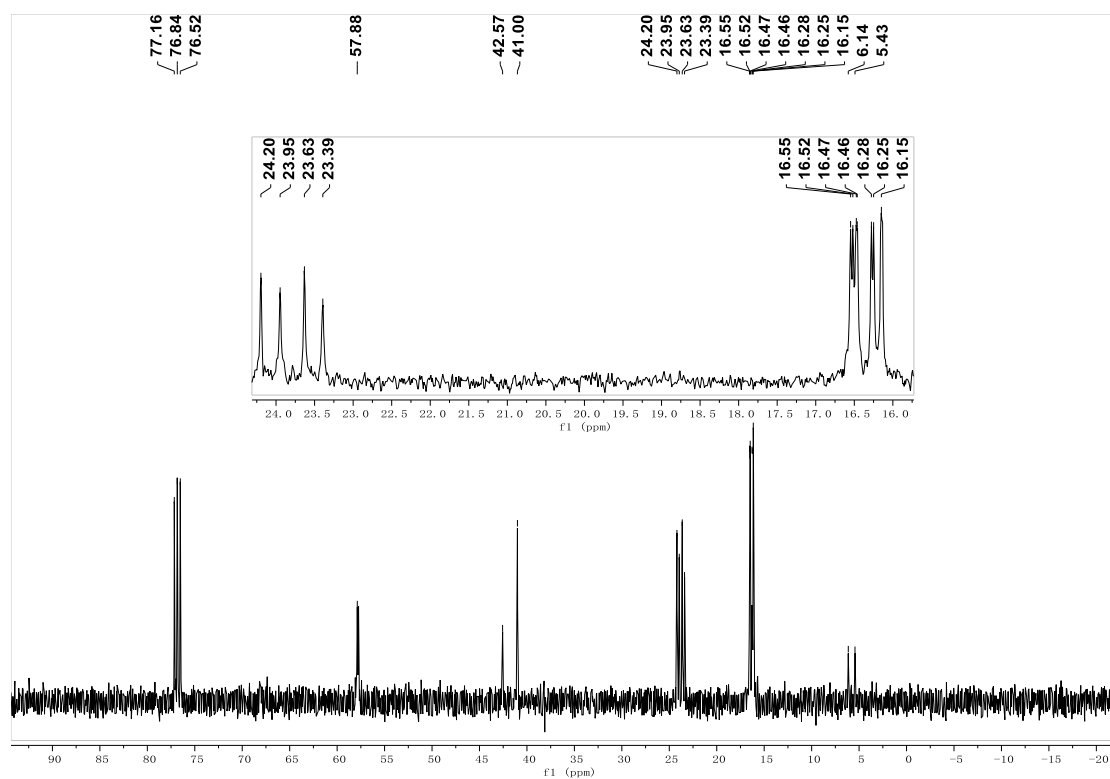

Figure S14  $^{13}\text{C}\{^1\text{H}\}$  NMR spectrum of complex **5** ( $\text{CDCl}_3$ )



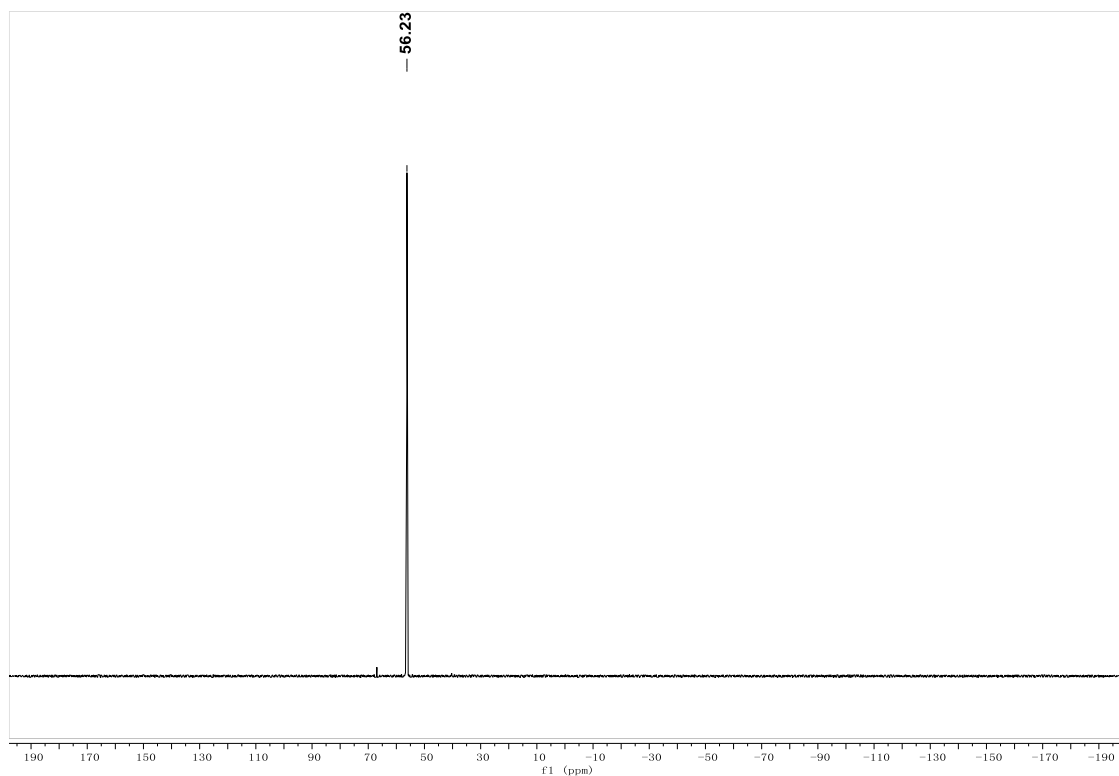

Figure S15 <sup>31</sup>P{<sup>1</sup>H} NMR spectrum of complex 5 (CDCl<sub>3</sub>)

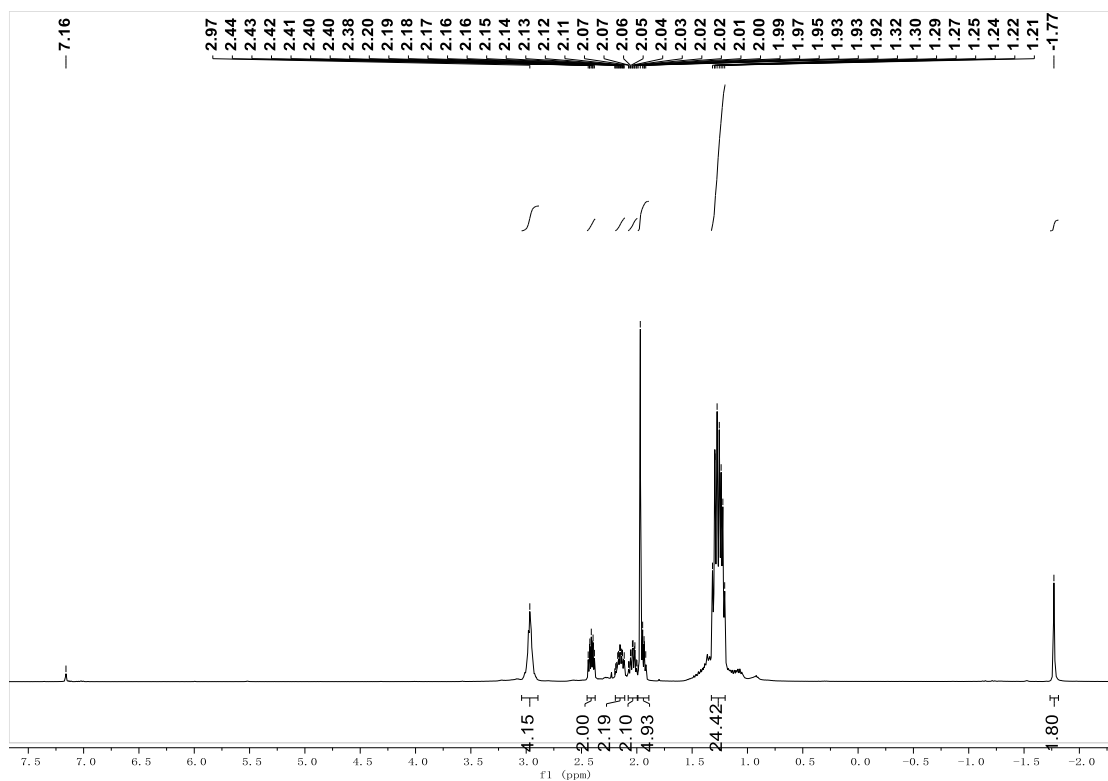

Figure S16 <sup>1</sup>H NMR spectrum of complex 6 (C<sub>6</sub>D<sub>6</sub>)

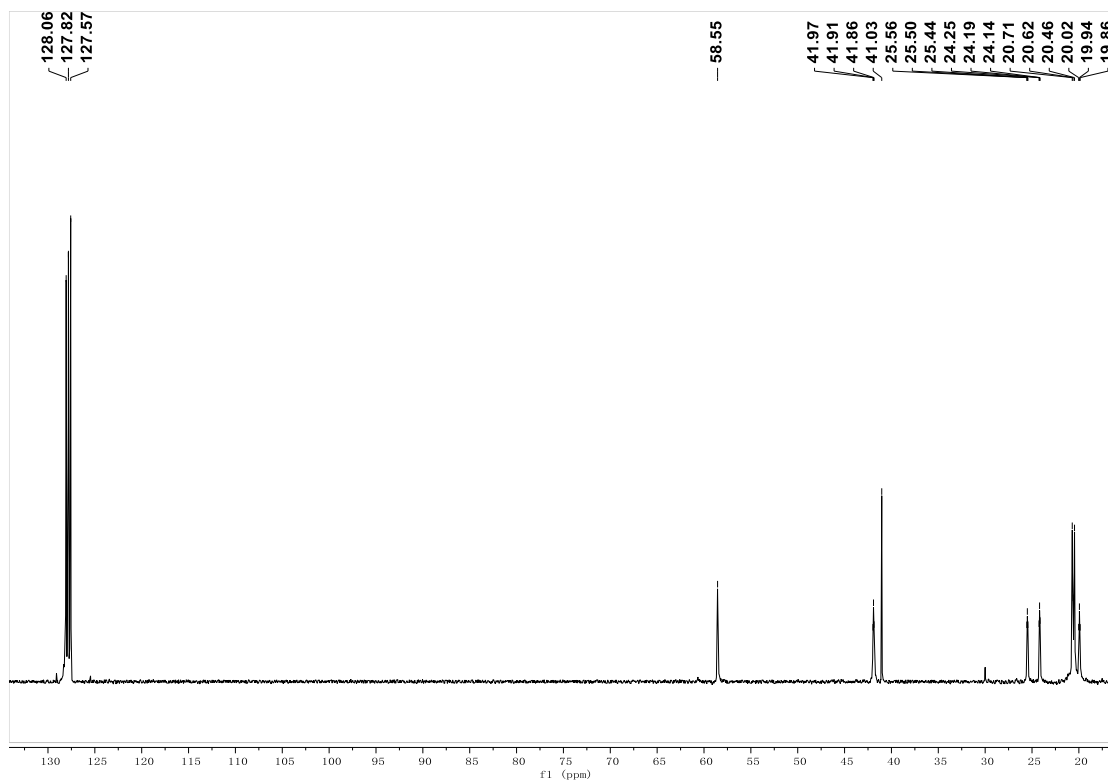

**Figure S17**  $^{13}\text{C}\{^1\text{H}\}$  NMR spectrum of complex **6** ( $\text{C}_6\text{D}_6$ )

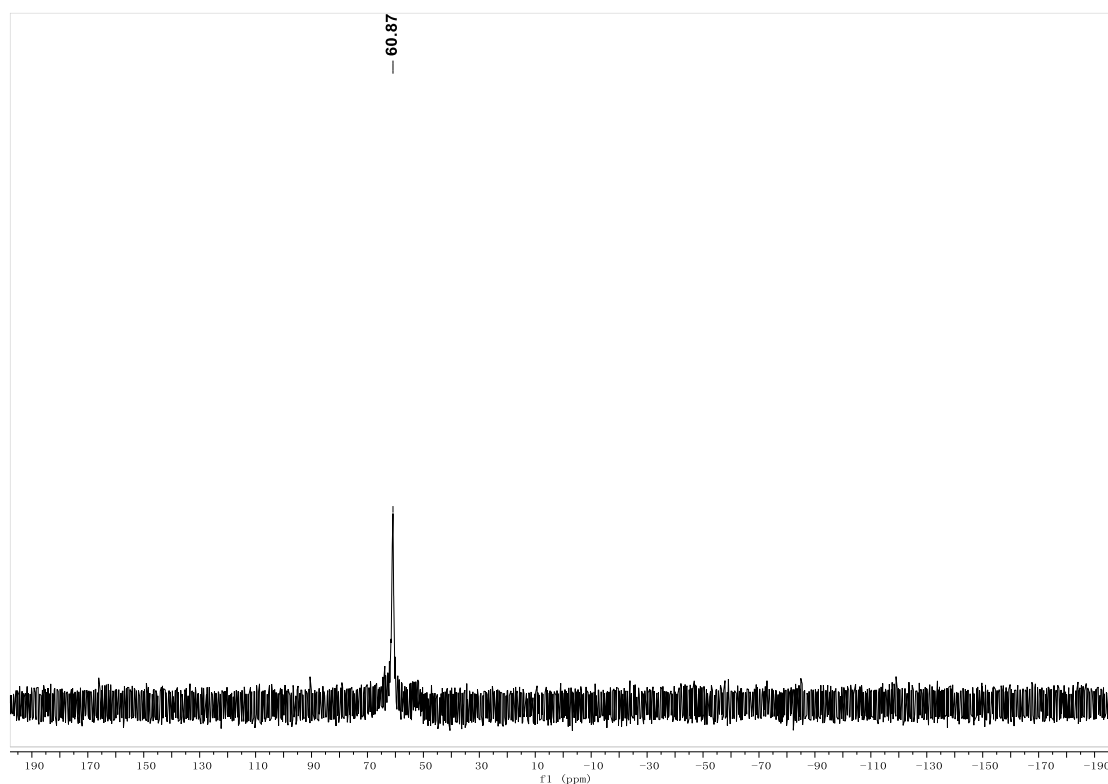

**Figure S18**  $^{31}\text{P}\{^1\text{H}\}$  NMR spectrum of complex **6** ( $\text{C}_6\text{D}_6$ )

## 2. Crystal data and structure refinement

**Table S1.** Crystal data and structure refinements for **1** and **2**.

|                                                               | Compound 1                                                                                                                    | Compound 2                                                                                                   |
|---------------------------------------------------------------|-------------------------------------------------------------------------------------------------------------------------------|--------------------------------------------------------------------------------------------------------------|
| Empirical formula                                             | C <sub>47</sub> H <sub>106</sub> Cl <sub>2</sub> Li <sub>2</sub> Mg <sub>2</sub> N <sub>6</sub> O <sub>2</sub> P <sub>4</sub> | C <sub>37</sub> H <sub>85</sub> Cu <sub>2</sub> I <sub>2</sub> Mg <sub>2</sub> N <sub>6</sub> P <sub>4</sub> |
| Formula weight                                                | 1044.65                                                                                                                       | 1167.48                                                                                                      |
| Temperature [K]                                               | 190.0                                                                                                                         | 193.00                                                                                                       |
| Crystal system                                                | triclinic                                                                                                                     | orthorhombic                                                                                                 |
| Space group                                                   | <i>P</i> -1                                                                                                                   | <i>F</i> dd2                                                                                                 |
| <i>a</i> /Å                                                   | 11.7919(8)                                                                                                                    | 23.6804(7)                                                                                                   |
| <i>b</i> /Å                                                   | 12.9748(9)                                                                                                                    | 63.6047(17)                                                                                                  |
| <i>c</i> /Å                                                   | 22.3011(15)                                                                                                                   | 13.9335(4)                                                                                                   |
| <i>α</i> /°                                                   | 93.839(2)                                                                                                                     | 90                                                                                                           |
| <i>β</i> /°                                                   | 98.412(2)                                                                                                                     | 90                                                                                                           |
| <i>γ</i> /°                                                   | 109.612(2)                                                                                                                    | 90                                                                                                           |
| Volume/Å <sup>3</sup>                                         | 3154.7(4)                                                                                                                     | 20986.4(10)                                                                                                  |
| <i>Z</i>                                                      | 2                                                                                                                             | 16                                                                                                           |
| $\rho_{\text{calc}}/\text{g cm}^{-3}$                         | 1.100                                                                                                                         | 1.478                                                                                                        |
| $\mu/\text{mm}^{-1}$                                          | 0.261                                                                                                                         | 11.801                                                                                                       |
| <i>F</i> (000)                                                | 1140.0                                                                                                                        | 9552.0                                                                                                       |
| Crystal size/mm <sup>3</sup>                                  | 0.2 × 0.18 × 0.16                                                                                                             | 0.2 × 0.18 × 0.16                                                                                            |
| Radiation                                                     | MoK $\alpha$<br>( $\lambda$ = 0.71073)                                                                                        | GaK $\alpha$<br>( $\lambda$ = 1.34139)                                                                       |
| 2 $\theta$ range for data collection/°                        | 3.856 to 49.998                                                                                                               | 4.834 to 107.984                                                                                             |
| Index ranges                                                  | -14 ≤ <i>h</i> ≤ 14,<br>-15 ≤ <i>k</i> ≤ 12,<br>-26 ≤ <i>l</i> ≤ 26                                                           | -28 ≤ <i>h</i> ≤ 28,<br>76 ≤ <i>k</i> ≤ 73,<br>-16 ≤ <i>l</i> ≤ 16                                           |
| Reflections collected                                         | 24096                                                                                                                         | 65160                                                                                                        |
| Independent reflections                                       | 11061<br>[R <sub>int</sub> = 0.0898]                                                                                          | 9212<br>[R <sub>int</sub> = 0.0386]                                                                          |
| Data/restraints/parameters                                    | 11061/200/654                                                                                                                 | 9212/83/526                                                                                                  |
| Goodness-of-fit on <i>F</i> <sup>2</sup>                      | 1.008                                                                                                                         | 1.045                                                                                                        |
| Final <i>R</i> indexes [ <i>I</i> >= 2 $\sigma$ ( <i>I</i> )] | R1 = 0.0720,<br>wR2 = 0.1631                                                                                                  | R1 = 0.0191,<br>wR2 = 0.0437                                                                                 |
| Final <i>R</i> indexes [all data]                             | R1 = 0.1368,<br>wR2 = 0.1924                                                                                                  | R1 = 0.0207,<br>wR2 = 0.0441                                                                                 |
| Largest diff. peak/hole / e Å <sup>-3</sup>                   | 0.61/-0.36                                                                                                                    | 0.40/-0.48                                                                                                   |

**Table S2.** Crystal data and structure refinements for **3** and **4**.

|                                                               | Compound <b>3</b>                                                                                            | Compound <b>4</b>                                                                                             |
|---------------------------------------------------------------|--------------------------------------------------------------------------------------------------------------|---------------------------------------------------------------------------------------------------------------|
| Empirical formula                                             | C <sub>34</sub> H <sub>78</sub> Ag <sub>2</sub> I <sub>2</sub> Mg <sub>2</sub> N <sub>6</sub> P <sub>4</sub> | C <sub>34</sub> H <sub>77</sub> Au <sub>2</sub> Cl <sub>2</sub> Mg <sub>2</sub> N <sub>6</sub> P <sub>4</sub> |
| Formula weight                                                | 606.53                                                                                                       | 1207.34                                                                                                       |
| Temperature [K]                                               | 190.00                                                                                                       | 190.00                                                                                                        |
| Crystal system                                                | monoclinic                                                                                                   | triclinic                                                                                                     |
| Space group                                                   | C2/c                                                                                                         | P-1                                                                                                           |
| <i>a</i> /Å                                                   | 23.870(3)                                                                                                    | 12.441(18)                                                                                                    |
| <i>b</i> /Å                                                   | 14.5992(17)                                                                                                  | 13.95(3)                                                                                                      |
| <i>c</i> /Å                                                   | 14.7309(16)                                                                                                  | 16.13(3)                                                                                                      |
| $\alpha$ /°                                                   | 90                                                                                                           | 78.19(5)                                                                                                      |
| $\beta$ /°                                                    | 94.704(4)                                                                                                    | 87.56(4)                                                                                                      |
| $\gamma$ /°                                                   | 90                                                                                                           | 65.18(7)                                                                                                      |
| Volume/Å <sup>3</sup>                                         | 5116.2(10)                                                                                                   | 2483(8)                                                                                                       |
| Z                                                             | 8                                                                                                            | 2                                                                                                             |
| $\rho_{\text{calc}}$ /g cm <sup>-3</sup>                      | 1.575                                                                                                        | 1.615                                                                                                         |
| $\mu$ /mm <sup>-1</sup>                                       | 2.151                                                                                                        | 6.193                                                                                                         |
| <i>F</i> (000)                                                | 2432.0                                                                                                       | 1198.0                                                                                                        |
| Crystal size/mm <sup>3</sup>                                  | 0.22 × 0.2 × 0.18                                                                                            | 0.2 × 0.18 × 0.18                                                                                             |
| Radiation                                                     | MoK $\alpha$<br>( $\lambda$ = 0.71073)                                                                       | MoK $\alpha$<br>( $\lambda$ = 0.71073)                                                                        |
| 2 $\theta$ range for data collection/°                        | 5.58 to 55.016                                                                                               | 3.724 to 54.982                                                                                               |
| Index ranges                                                  | -30 ≤ <i>h</i> ≤ 30,<br>-18 ≤ <i>k</i> ≤ 16,<br>-19 ≤ <i>l</i> ≤ 18                                          | -16 ≤ <i>h</i> ≤ 13,<br>-18 ≤ <i>k</i> ≤ 18,<br>-20 ≤ <i>l</i> ≤ 20                                           |
| Reflections collected                                         | 24208                                                                                                        | 23756                                                                                                         |
| Independent reflections                                       | 5869<br>[Rint = 0.0570]                                                                                      | 11309<br>[Rint = 0.0720]                                                                                      |
| Data/restraints/parameters                                    | 5869/283/316                                                                                                 | 11309/81/502                                                                                                  |
| Goodness-of-fit on <i>F</i> <sup>2</sup>                      | 1.011                                                                                                        | 1.017                                                                                                         |
| Final <i>R</i> indexes [ <i>I</i> >= 2 $\sigma$ ( <i>I</i> )] | R1 = 0.0398,<br>wR2 = 0.0741                                                                                 | R1 = 0.0557,<br>wR2 = 0.1116                                                                                  |
| Final <i>R</i> indexes [all data]                             | R1 = 0.0782,<br>wR2 = 0.0868                                                                                 | R1 = 0.1067,<br>wR2 = 0.1324                                                                                  |
| Largest diff. peak/hole / e Å <sup>-3</sup>                   | 0.75/-0.70                                                                                                   | 1.41/-1.55                                                                                                    |

**Table S3.** Crystal data and structures refinements for **5** and **6**.

|                                                              | Compound <b>5</b>                                                              | Compound <b>6</b>                                                                             |
|--------------------------------------------------------------|--------------------------------------------------------------------------------|-----------------------------------------------------------------------------------------------|
| Empirical formula                                            | C <sub>19</sub> H <sub>45</sub> I <sub>2</sub> MgN <sub>3</sub> P <sub>2</sub> | C <sub>34</sub> H <sub>82</sub> Mg <sub>2</sub> N <sub>8</sub> Na <sub>2</sub> P <sub>4</sub> |
| Formula weight                                               | 655.63                                                                         | 821.55                                                                                        |
| Temperature [K]                                              | 296.15                                                                         | 193.00                                                                                        |
| Crystal system                                               | monoclinic                                                                     | monoclinic                                                                                    |
| Space group                                                  | <i>Ia</i>                                                                      | <i>P21/n</i>                                                                                  |
| <i>a</i> /Å                                                  | 13.868(3)                                                                      | 12.9772(6)                                                                                    |
| <i>b</i> /Å                                                  | 15.384(5)                                                                      | 15.3074(7)                                                                                    |
| <i>c</i> /Å                                                  | 14.660(9)                                                                      | 13.8680(6)                                                                                    |
| $\alpha$ /°                                                  | 90                                                                             | 90                                                                                            |
| $\beta$ /°                                                   | 110.85(3)                                                                      | 114.657(3)                                                                                    |
| $\gamma$ /°                                                  | 90                                                                             | 90                                                                                            |
| Volume/Å <sup>3</sup>                                        | 2923(2)                                                                        | 2503.7(2)                                                                                     |
| Z                                                            | 4                                                                              | 2                                                                                             |
| $\rho_{\text{calc}}$ /g cm <sup>-3</sup>                     | 1.490                                                                          | 1.090                                                                                         |
| $\mu$ /mm <sup>-1</sup>                                      | 2.292                                                                          | 1.321                                                                                         |
| <i>F</i> (000)                                               | 1312.0                                                                         | 896.0                                                                                         |
| Crystal size/mm <sup>3</sup>                                 | 0.2 × 0.18 × 0.16                                                              | 0.2 × 0.18 × 0.16                                                                             |
| Radiation                                                    | MoK $\alpha$<br>( $\lambda$ = 0.71073)                                         | GaK $\alpha$<br>( $\lambda$ = 1.34139)                                                        |
| 2 $\theta$ range for data collection/°                       | 3.98 to 49.992                                                                 | 6.822 to 107.922                                                                              |
| Index ranges                                                 | -16 ≤ <i>h</i> ≤ 14,<br>-18 ≤ <i>k</i> ≤ 18,<br>-17 ≤ <i>l</i> ≤ 17            | -15 ≤ <i>h</i> ≤ 15,<br>-18 ≤ <i>k</i> ≤ 13,<br>-16 ≤ <i>l</i> ≤ 16                           |
| Reflections collected                                        | 11066                                                                          | 18150                                                                                         |
| Independent reflections                                      | 4085<br>[Rint = 0.0930]                                                        | 4588<br>[Rint = 0.0775]                                                                       |
| Data/restraints/parameters                                   | 4085/484/364                                                                   | 4588/0/243                                                                                    |
| Goodness-of-fit on <i>F</i> <sup>2</sup>                     | 0.943                                                                          | 1.032                                                                                         |
| Final <i>R</i> indexes [ <i>I</i> >= 2 $\sigma$ ( <i>I</i> ) | R1 = 0.0545,<br>wR2 = 0.0682                                                   | R1 = 0.0551,<br>wR2 = 0.1273                                                                  |
| Final <i>R</i> indexes [all data]                            | R1 = 0.1411,<br>wR2 = 0.0809                                                   | R1 = 0.1243,<br>wR2 = 0.1548                                                                  |
| Largest diff. peak/hole / e Å <sup>-3</sup>                  | 0.40/-0.33                                                                     | 0.25/-0.47                                                                                    |

### 3. Molecular Structure, Bond Lengths and Angles

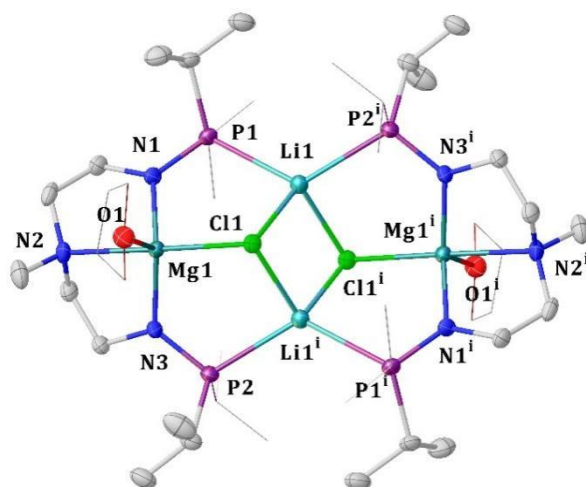

**Figure S19** Molecular structure of **1** from X-ray diffraction. Hydrogen atoms are omitted for clarity. Thermal ellipsoids are drawn at the 30% probability level.

**Table S4** Selected Bond Lengths [ $\text{\AA}$ ] and Angles [ $^\circ$ ] for **1**

| Bond lengths |            |                                       |            |
|--------------|------------|---------------------------------------|------------|
| Mg1-N1       | 2.028(3)   | Mg1-Cl1                               | 2.4919(15) |
| Mg1-N2       | 2.271(3)   | Li1-Cl1                               | 2.380(6)   |
| Mg1-N3       | 2.026(4)   | Li1-P1                                | 2.609(7)   |
| Mg1-O1       | 2.123(3)   |                                       |            |
| Angles       |            |                                       |            |
| O1-Mg1-N2    | 85.59(13)  | N1-Mg1-N2                             | 80.83(12)  |
| O1-Mg1-Cl1   | 85.40(9)   | N2-Mg1-Cl1 <sup>i</sup>               | 170.98(11) |
| N3-Mg1-Cl1   | 103.14(10) | Cl1-Li1-Cl1 <sup>i</sup>              | 96.5(3)    |
| N3-Mg1-O1    | 117.54(13) | Cl1-Li1-P2 <sup>i</sup>               | 119.0(2)   |
| N3-Mg1-N1    | 125.58(14) | Cl1 <sup>i</sup> -Li1-P2 <sup>i</sup> | 96.8(2)    |
| N3-Mg1-N2    | 80.89(14)  | Cl1-Li1-P1                            | 97.7(2)    |
| N1-Mg1-Cl1   | 102.75(10) | Cl1 <sup>i</sup> -Li1-P1              | 120.4(3)   |
| N1-Mg1-O1    | 111.53(15) | P2 <sup>i</sup> -Li1-P1               | 124.3(3)   |

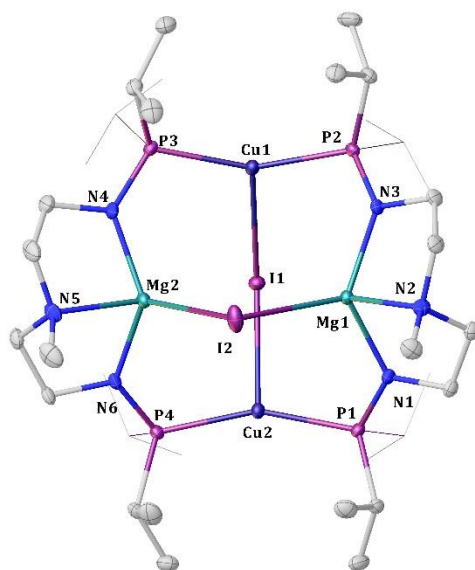

**Figure S20** Molecular structure of **2** from X-ray diffraction. Hydrogen atoms and solvent are omitted for clarity. Thermal ellipsoids are drawn at the 30% probability level.

**Table S5** Selected Bond Lengths [ $\text{\AA}$ ] and Angles [ $^\circ$ ] for **2**

| Bond lengths |             |           |            |
|--------------|-------------|-----------|------------|
| Mg1-N1       | 2.044(3)    | Mg1-I2    | 2.8348(12) |
| Mg1-N2       | 2.205(3)    | Mg2-I2    | 2.8475(12) |
| Mg1-N3       | 2.048(3)    | Cu1-P2    | 2.2256(10) |
| Mg2-N4       | 2.037(4)    | Cu1-P3    | 2.2271(10) |
| Mg2-N5       | 2.215(3)    | Cu2-P1    | 2.2199(10) |
| Mg2-N6       | 2.036(3)    | Cu2-P4    | 2.2224(10) |
| Mg1-I1       | 3.2074(11)  | Cu1-I1    | 2.7543(6)  |
| Mg2-I1       | 3.1443(12)  | Cu2-I1    | 2.7822(6)  |
| Angles       |             |           |            |
| Cu1-I1-Mg1   | 76.41(2)    | N1-Mg1-N3 | 131.08(13) |
| Cu1-I1-Mg2   | 78.89(3)    | N1-Mg1-I2 | 114.00(10) |
| Cu2-I1-Cu1   | 144.471(18) | N1-Mg1-N2 | 80.29(12)  |
| Cu2-I1-Mg2   | 77.60(3)    | N2-Mg1-I2 | 104.61(9)  |
| Cu2-I1-Mg1   | 76.38(2)    | N3-Mg1-I2 | 114.41(10) |

|            |           |           |            |
|------------|-----------|-----------|------------|
| Mg2-I1-Mg1 | 87.68(3)  | N6-Mg2-I2 | 112.71(10) |
| Mg2-I2-Mg1 | 101.48(3) | N3-Mg1-N2 | 81.41(12)  |
| P2-Cu1-I1  | 101.51(3) | N4-Mg2-I2 | 112.81(10) |
| P3-Cu1-I1  | 104.28(3) | N4-Mg2-N5 | 80.81(13)  |
| P2-Cu1-P3  | 153.43(4) | N5-Mg2-I2 | 104.85(10) |
| P1-Cu2-I1  | 102.84(3) | N6-Mg2-I1 | 93.97(9)   |
| P1-Cu2-P4  | 156.69(5) | N6-Mg2-N4 | 133.75(13) |
| P4-Cu2-I1  | 100.44(3) | N6-Mg2-N5 | 80.26(12)  |

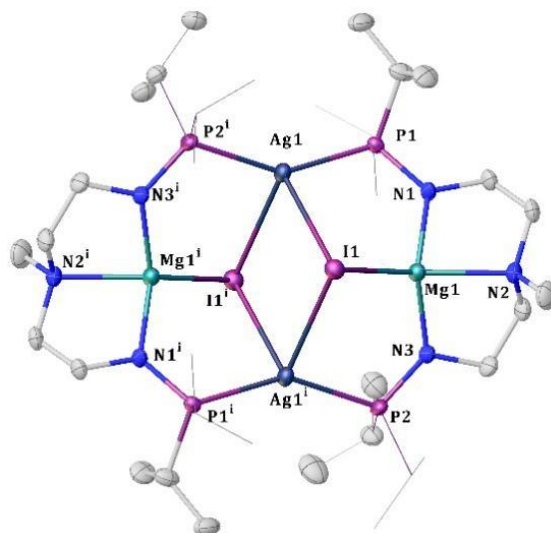

**Figure S21** Molecular structure of **3** from X-ray diffraction. Hydrogen atoms are omitted for clarity. Thermal ellipsoids are drawn at the 30% probability level.

**Table S6** Selected Bond Lengths [ $\text{\AA}$ ] and Angles [ $^\circ$ ] for **3**

| Bond lengths |            |                      |            |
|--------------|------------|----------------------|------------|
| Mg1-N1       | 2.000(4)   | Ag1 <sup>i</sup> -I1 | 3.1413(5)  |
| Mg1-N2       | 2.203(4)   | Ag1-I1 <sup>i</sup>  | 3.1412(5)  |
| Mg1-N3       | 2.002(4)   | Ag1-P1               | 2.4271(12) |
| Mg1-I1-      | 2.7152(15) | Ag1-P2 <sup>i</sup>  | 2.4320(13) |



|                          |            |                                      |            |
|--------------------------|------------|--------------------------------------|------------|
| Ag1-I1                   | 3.2203(5)  |                                      |            |
| Angles                   |            |                                      |            |
| Ag1 <sup>i</sup> -I1-Ag1 | 93.920(14) | P2 <sup>i</sup> -Ag1-I1 <sup>i</sup> | 97.07(4)   |
| Mg1-I1-Ag1               | 79.20(3)   | N1-Mg1-I1                            | 109.18(11) |
| Mg1-I1-Ag1 <sup>i</sup>  | 81.13(3)   | N1-Mg1-N2                            | 82.53(15)  |
| I1 <sup>i</sup> -Ag1-I1  | 86.081(14) | N1-Mg1-N3                            | 135.25(16) |
| P1-Ag1-I1 <sup>i</sup>   | 106.93(3)  | N2-Mg1-I1                            | 134.22(12) |
| P1-Ag1-I1                | 97.05(3)   | N3-Mg1-I1                            | 111.18(12) |
| P1-Ag1-P2 <sup>i</sup>   | 148.29(4)  | N3-Mg1-N2                            | 83.06(16)  |
| P2 <sup>i</sup> -Ag1-I1  | 105.12(3)  |                                      |            |

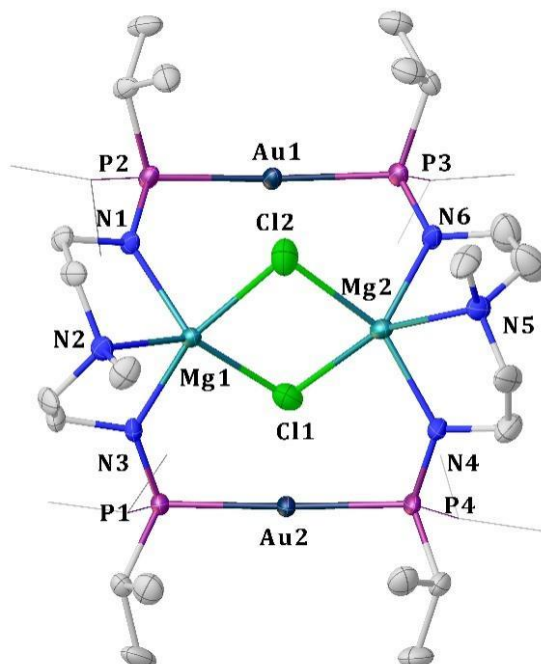

**Figure S22** Molecular structure of **4** from X-ray diffraction. Hydrogen atoms are omitted for clarity. Thermal ellipsoids are drawn at the 30% probability level.

**Table S7** Selected Bond Lengths [Å] and Angles [°] for **4**

| Bond lengths |          |         |          |
|--------------|----------|---------|----------|
| Mg1-N1       | 2.082(8) | Mg2-N6  | 2.107(8) |
| Mg1-N2       | 2.385(8) | Mg2-Cl1 | 2.43(2)  |

|               |            |               |           |
|---------------|------------|---------------|-----------|
| Mg1-N3        | 2.072(8)   | Mg2-Cl2       | 2.44(2)   |
| Mg1-Cl1       | 2.49(2)    | Mg2-Cl1A      | 2.440(6)  |
| Mg1-Cl2       | 2.42(2)    | Mg2-Cl2A      | 2.424(5)  |
| Mg1-Cl1A      | 2.487(5)   | Au1-P2        | 2.300(4)  |
| Mg1-Cl2A      | 2.412(6)   | Au1-P3        | 2.310(4)  |
| Mg2-N4        | 2.097(8)   | Au2-P1        | 2.307(4)  |
| Mg2-N5        | 2.339(9)   | Au2-P4        | 2.313(4)  |
| Angles        |            |               |           |
| P1-Au2-P4     | 174.33(9)  | N4-Mg2-N6     | 117.4(3)  |
| P2-Au1-P3     | 171.06(10) | N4-Mg2-N5     | 78.9(3)   |
| N3-Mg1-Cl1A   | 96.6(2)    | N4-Mg2-Cl2    | 148(2)    |
| N3-Mg1-Cl2A   | 129.0(3)   | N4-Mg2-Cl1A   | 103.7(3)  |
| Cl2-Mg1-Cl1   | 87.8(8)    | N4-Mg2-Cl2A   | 113.0(3)  |
| Cl2A-Mg1-Cl1A | 88.3(2)    | N5-Mg2-Cl1    | 158.4(19) |
| Cl1-Mg2-Cl2   | 88.6(9)    | N5-Mg2-Cl2    | 101.0(12) |
| N6-Mg2-Cl1    | 120.8(19)  | N5-Mg2-Cl1A   | 175.0(3)  |
| N6-Mg2-N5     | 78.2(4)    | N5-Mg2-Cl2A   | 93.6(3)   |
| N6-Mg2-Cl2    | 93.6(18)   | Cl2A-Mg2-Cl1A | 89.1(2)   |
| N6-Mg2-Cl1A   | 96.8(3)    | Mg2-Cl1A-Mg1  | 90.2(2)   |
| N6-Mg2-Cl2A   | 125.9(3)   | Mg2-Cl1-Mg1   | 90.3(7)   |
| N4-Mg2-Cl1    | 82.7(13)   | Mg1-Cl2A-Mg2  | 92.3(2)   |

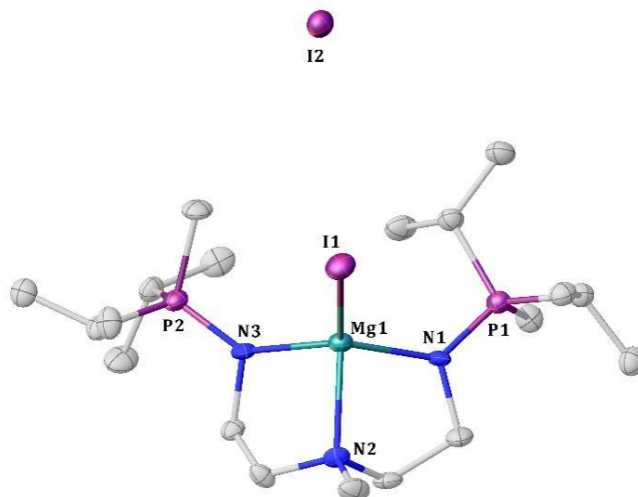

**Figure S23** Molecular structure of **5** from X-ray diffraction. Hydrogen atoms are omitted for clarity. Thermal ellipsoids are drawn at the 30% probability level.

**Table S8** Selected Bond Lengths [Å] and Angles [°] for **5**

| Bond lengths |           |           |           |
|--------------|-----------|-----------|-----------|
| Mg1-I1       | 2.706(5)  | N1-P1     | 1.596(15) |
| Mg1-N1       | 2.009(13) | N1-P1A    | 1.60(2)   |
| Mg1-N2       | 2.112(12) | N3-P2     | 1.586(12) |
| Mg1-N3       | 2.025(12) |           |           |
| Angles       |           |           |           |
| N1-Mg1-I1    | 115.5(4)  | N2-Mg1-I1 | 117.0(4)  |
| N1-Mg1-N2    | 85.0(5)   | N3-Mg1-I1 | 116.1(4)  |
| N1-Mg1-N3    | 126.0(5)  | N3-Mg1-N2 | 85.4(5)   |

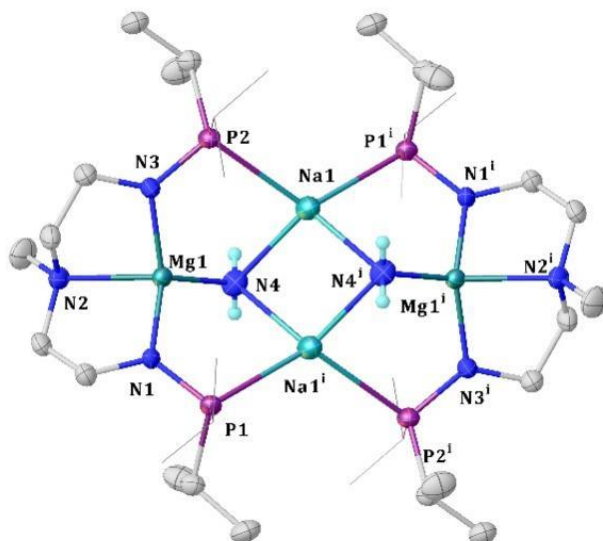

**Figure S24** Molecular structure of **6** from X-ray diffraction. Hydrogen atoms are omitted for clarity. Thermal ellipsoids are drawn at the 30% probability level.

**Table S9** Selected Bond Lengths [Å] and Angles [°] for **6**

| Bond lengths                          |            |                                      |            |
|---------------------------------------|------------|--------------------------------------|------------|
| Mg1-N1                                | 2.015(3)   | Na1-N4                               | 2.391(4)   |
| Mg1-N2                                | 2.189(3)   | P1-Na1 <sup>i</sup>                  | 2.8360(17) |
| Mg1-N3                                | 2.006(3)   | P2-Na1                               | 2.8482(18) |
| Mg1-N4                                | 2.018(4)   | Na1-P1 <sup>i</sup>                  | 2.8359(17) |
| Na1-N4 <sup>i</sup>                   | 2.418(4)   |                                      |            |
| Angles                                |            |                                      |            |
| N1-Mg1-N2                             | 82.05(11)  | P2-Na1-Mg1 <sup>i</sup>              | 154.12(7)  |
| N1-Mg1-N4                             | 111.08(15) | N4-Na1-P1 <sup>i</sup>               | 124.88(11) |
| N3-Mg1-N1                             | 129.26(13) | N4 <sup>i</sup> -Na1-P1 <sup>i</sup> | 90.77(10)  |
| N3-Mg1-N2                             | 82.84(12)  | N4-Na1-P2                            | 91.89(10)  |
| N3-Mg1-N4                             | 111.00(16) | N4 <sup>i</sup> -Na1-P2              | 124.25(11) |
| N4-Mg1-N2                             | 140.94(14) | Mg1-N4-Na1 <sup>i</sup>              | 102.50(15) |
| P1 <sup>i</sup> -Na1-P2               | 122.86(6)  | Mg1-N4-Na1                           | 102.13(16) |
| P1 <sup>i</sup> -Na1-Mg1 <sup>i</sup> | 60.22(4)   | Na1-N4-Na1 <sup>i</sup>              | 76.27(12)  |

#### 4. Cartesian Coordinates

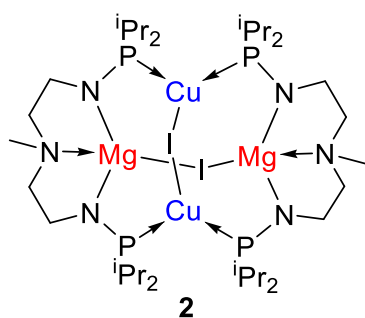

|    |             |             |             |
|----|-------------|-------------|-------------|
| I  | 0.03093600  | -0.02829700 | -1.52283100 |
| I  | -0.04436000 | -0.01466800 | 2.65880400  |
| Cu | 2.78220200  | 0.03563900  | -0.66184700 |
| Cu | -2.73907900 | -0.02493700 | -0.70028300 |
| P  | -3.11077700 | -2.28749100 | -0.44391000 |
| P  | 3.18563600  | -2.23536600 | -0.50317200 |
| P  | -3.12819800 | 2.24441400  | -0.54934900 |
| P  | 3.12798500  | 2.30465900  | -0.41018500 |
| Mg | -0.02791400 | 2.25934100  | 0.84381300  |
| Mg | 0.05471300  | -2.27340600 | 0.79352200  |
| N  | -1.81616000 | -3.04441700 | 0.34252800  |
| N  | -1.89198800 | 3.00310400  | 0.32406400  |
| N  | 1.98875300  | -2.95882900 | 0.45211100  |
| N  | 1.89078000  | 2.99631700  | 0.51484500  |
| N  | 0.04476100  | -4.08710800 | 2.16933000  |
| N  | -0.11006400 | 4.06667600  | 2.21430600  |
| C  | -2.19061200 | -3.78356600 | -2.69363300 |
| H  | -2.41516300 | -4.28832400 | -3.64286500 |
| H  | -1.71832400 | -4.50779500 | -2.02513400 |
| H  | -1.45519000 | -2.99707500 | -2.89723800 |
| C  | -3.47514300 | -3.19283500 | -2.09686200 |

|   |             |             |             |
|---|-------------|-------------|-------------|
| H | -4.17403300 | -4.01283600 | -1.87727300 |
| C | -4.13398600 | -2.23524800 | -3.10364600 |
| H | -3.44438300 | -1.42492000 | -3.36978900 |
| H | -5.04972400 | -1.77596000 | -2.71868700 |
| H | -4.39220000 | -2.76842100 | -4.02847000 |
| C | -5.96993800 | -2.22649700 | -0.07596800 |
| H | -5.94738100 | -1.14596800 | -0.26277700 |
| H | -6.81914400 | -2.42779500 | 0.59047400  |
| H | -6.17424400 | -2.73019500 | -1.02573600 |
| C | -4.51900000 | -2.15401400 | 1.99626600  |
| H | -3.57138500 | -2.45045800 | 2.45514300  |
| H | -5.34089000 | -2.50678800 | 2.63297400  |
| H | -4.54433900 | -1.05895800 | 1.99430400  |
| C | -4.66533200 | -2.70869400 | 0.57243600  |
| H | -4.70198900 | -3.80555900 | 0.62610900  |
| C | -2.04772200 | -4.39572100 | 0.85258900  |
| H | -2.46808300 | -5.08321200 | 0.09715300  |
| H | -2.76298100 | -4.41203200 | 1.69266200  |
| C | -0.72985200 | -5.01947800 | 1.32102300  |
| H | -0.91705000 | -5.96830500 | 1.85372800  |
| H | -0.12189900 | -5.24917500 | 0.44156100  |
| C | -0.56779500 | -3.93511200 | 3.49760800  |
| H | 0.00204500  | -3.20535400 | 4.07821900  |
| H | -0.58935800 | -4.89214200 | 4.04563300  |
| H | -1.58953100 | -3.56269800 | 3.39996700  |
| C | 1.45749400  | -4.49936800 | 2.28617200  |

|   |            |             |             |   |             |            |             |
|---|------------|-------------|-------------|---|-------------|------------|-------------|
| H | 1.53756600 | -5.54485700 | 2.63395400  | H | 3.92283900  | 2.56248000 | 2.45163800  |
| H | 1.91307500 | -3.85563100 | 3.04621900  | H | 5.69979100  | 2.53408200 | 2.39954000  |
| C | 2.22021100 | -4.30649700 | 0.97079200  | C | 5.99917500  | 2.24805400 | -0.34382200 |
| H | 3.27487300 | -4.50620600 | 1.20770000  | H | 6.91833500  | 2.47228800 | 0.21342300  |
| H | 1.93441300 | -5.09859300 | 0.25503800  | H | 6.08807300  | 2.72426800 | -1.32518800 |
| C | 2.02693400 | -3.81635000 | -2.59596500 | H | 5.96253800  | 1.16316100 | -0.49545400 |
| H | 1.21225600 | -3.08862000 | -2.67551100 | C | 4.77597700  | 2.74593900 | 0.43958000  |
| H | 1.71984200 | -4.58160600 | -1.87783200 | H | 4.83179800  | 3.84283400 | 0.46860100  |
| H | 2.14047000 | -4.29945500 | -3.57579800 | C | 3.82893400  | 2.27407100 | -3.17273900 |
| C | 3.79050100 | -2.15549900 | -3.29004300 | H | 3.08863500  | 1.48824800 | -3.36604300 |
| H | 3.93034700 | -2.68164900 | -4.24405600 | H | 4.76886500  | 1.78288400 | -2.90119300 |
| H | 4.73133100 | -1.64966700 | -3.04982900 | H | 3.99471000  | 2.81501100 | -4.11415200 |
| H | 3.02888100 | -1.38186600 | -3.44537900 | C | 1.99831400  | 3.87549200 | -2.51609700 |
| C | 3.34327000 | -3.13711100 | -2.19391000 | H | 2.12431700  | 4.37583200 | -3.48570600 |
| H | 4.11410600 | -3.91189300 | -2.07313600 | H | 1.64381400  | 4.61858500 | -1.79669600 |
| C | 6.04740700 | -2.11548200 | -0.54309000 | H | 1.21151800  | 3.12183200 | -2.62882400 |
| H | 6.11857200 | -2.58825200 | -1.52749900 | C | 3.32146200  | 3.23161600 | -2.08195100 |
| H | 6.99331500 | -2.30501400 | -0.01892300 | H | 4.06669500  | 4.02582400 | -1.92953100 |
| H | 5.96354500 | -1.03272800 | -0.69326100 | C | 2.08423600  | 4.33958700 | 1.06101300  |
| C | 4.92426300 | -2.14200300 | 1.72559800  | H | 1.79562200  | 5.13699400 | 0.35225600  |
| H | 4.87998100 | -1.04734200 | 1.74848600  | H | 3.12935100  | 4.55859800 | 1.32092500  |
| H | 5.86097000 | -2.44970100 | 2.20872900  | C | 1.29333300  | 4.50012700 | 2.36484800  |
| H | 4.08777700 | -2.51212000 | 2.32565300  | H | 1.74547000  | 3.85556900 | 3.12642400  |
| C | 4.87035500 | -2.65621100 | 0.28108100  | H | 1.34854300  | 5.54254600 | 2.72673200  |
| H | 4.95287900 | -3.75175100 | 0.29329900  | C | -0.75264200 | 3.89578100 | 3.52568800  |
| C | 4.78728900 | 2.21472800  | 1.87904300  | H | -0.78844900 | 4.84522700 | 4.08589200  |
| H | 4.76202000 | 1.11926500  | 1.89003900  | H | -0.19637600 | 3.15803400 | 4.10962700  |

|   |             |            |             |
|---|-------------|------------|-------------|
| H | -1.77188600 | 3.52536100 | 3.39700500  |
| C | -0.87792300 | 4.99329900 | 1.35337900  |
| H | -0.24632300 | 5.25050100 | 0.49916800  |
| H | -1.10406100 | 5.92967400 | 1.89289600  |
| C | -2.16452100 | 4.34870800 | 0.82939700  |
| H | -2.91482600 | 4.34827000 | 1.63832900  |
| H | -2.56384400 | 5.03396500 | 0.06059100  |
| C | -2.03922100 | 3.73613400 | -2.73189900 |
| H | -1.64788400 | 4.48563300 | -2.03882400 |
| H | -2.18978600 | 4.21790600 | -3.70723800 |
| H | -1.26992600 | 2.96561000 | -2.85273700 |
| C | -3.90402200 | 2.13587200 | -3.28671500 |
| H | -3.17764000 | 1.33581400 | -3.47451600 |
| H | -4.08850300 | 2.64830300 | -4.24051800 |
| H | -4.84191800 | 1.66440600 | -2.97650100 |
| C | -3.35714000 | 3.12274200 | -2.24186000 |
| H | -4.08966700 | 3.92976400 | -2.09790100 |
| C | -6.00388000 | 2.22135800 | -0.45944800 |
| H | -5.97427500 | 1.14050000 | -0.64410500 |
| H | -6.10551100 | 2.72633000 | -1.42496100 |
| H | -6.91333900 | 2.43231500 | 0.11848400  |
| C | -4.77248000 | 2.13260700 | 1.74764100  |
| H | -5.67378700 | 2.45837400 | 2.28345200  |
| H | -3.89768600 | 2.45508500 | 2.31955200  |
| H | -4.76684800 | 1.03747900 | 1.73718400  |
| C | -4.76572000 | 2.68977000 | 0.31807900  |
| H | -4.79569900 | 3.78699800 | 0.36922800  |

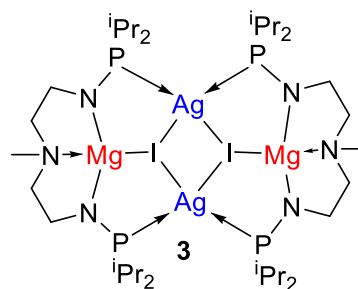

E- $\omega$ B97X-D = -818.857672615 au

|    |             |             |             |
|----|-------------|-------------|-------------|
| I  | -0.81587100 | 0.22678100  | -2.23980100 |
| Ag | 0.60942200  | 2.36151400  | -0.01858700 |
| P  | -1.53755200 | 3.55117800  | 0.61711000  |
| P  | -3.06963600 | -2.31592000 | 0.62470700  |
| Mg | -2.95160200 | 0.79281300  | -0.58869200 |
| N  | -2.90723300 | 2.72003200  | 0.07298500  |
| N  | -5.06328600 | 1.32322700  | -1.10652000 |
| N  | -3.83504500 | -0.87848600 | 0.16402300  |
| C  | -4.23539200 | 3.32214700  | 0.15871200  |
| H  | -4.22944400 | 4.41766600  | 0.05542900  |
| H  | -4.72889200 | 3.12883400  | 1.12820500  |
| C  | -1.70527000 | 3.91613400  | 2.49054900  |
| H  | -2.30177600 | 4.83558000  | 2.58629900  |
| C  | -5.12552700 | 2.79774800  | -0.98075900 |
| H  | -6.16783600 | 3.13735600  | -0.84953200 |
| H  | -4.75544000 | 3.20994300  | -1.92571800 |
| C  | -5.29481300 | -0.81612500 | 0.17490200  |
| H  | -5.74555200 | -1.18101500 | 1.11448400  |
| H  | -5.74813100 | -1.42756800 | -0.62508000 |
| C  | -5.75926300 | 0.63861700  | 0.01113600  |
| H  | -6.85273500 | 0.68624900  | -0.12867800 |

|   |             |             |             |    |             |             |             |
|---|-------------|-------------|-------------|----|-------------|-------------|-------------|
| H | -5.51871400 | 1.18283500  | 0.92870800  | C  | -3.51715800 | -1.32721800 | 3.25950800  |
| C | -1.64143600 | 5.29928400  | -0.14267500 | H  | -2.56824400 | -0.78158700 | 3.20612100  |
| H | -2.61998700 | 5.70456200  | 0.15031200  | H  | -3.72328300 | -1.53363900 | 4.31813600  |
| C | -2.44025400 | 2.77187100  | 3.20394400  | H  | -4.30101900 | -0.66560000 | 2.88158800  |
| H | -3.45400100 | 2.62517800  | 2.82256300  | C  | -3.66613700 | -5.12442300 | 0.23336200  |
| H | -2.50931000 | 2.98601200  | 4.27871600  | H  | -2.59518700 | -5.31600000 | 0.09584200  |
| H | -1.89882900 | 1.82608100  | 3.08987100  | H  | -4.21136300 | -5.87335900 | -0.35643100 |
| C | -4.04609700 | -3.71272300 | -0.23073000 | H  | -3.90924200 | -5.29791700 | 1.28607300  |
| H | -5.09886600 | -3.54342500 | 0.03553000  | C  | -0.56830100 | 6.26632500  | 0.37478800  |
| C | -3.43692300 | -2.64553400 | 2.47685900  | H  | -0.68687700 | 6.49141600  | 1.43887100  |
| H | -4.41261500 | -3.15027600 | 2.53052300  | H  | -0.62779200 | 7.21812300  | -0.16962100 |
| C | -0.33054600 | 4.13720000  | 3.14410500  | H  | 0.44059900  | 5.86439600  | 0.22264300  |
| H | 0.26724500  | 3.21945600  | 3.09636200  | C  | -2.36711800 | -3.55960400 | 3.09746100  |
| H | -0.45227100 | 4.40085300  | 4.20333500  | H  | -2.26364200 | -4.51345700 | 2.57128700  |
| H | 0.24592800  | 4.93609300  | 2.66857000  | H  | -2.61806400 | -3.78280300 | 4.14316100  |
| C | -5.57752900 | 0.87798200  | -2.41077000 | H  | -1.38876800 | -3.06489100 | 3.08805900  |
| H | -4.99732600 | 1.34535800  | -3.21155900 | I  | 0.81589000  | -0.22677300 | 2.23982400  |
| H | -6.63989500 | 1.14216000  | -2.54206800 | Ag | -0.60943000 | -2.36151700 | 0.01858800  |
| H | -5.47387900 | -0.20584400 | -2.50227500 | P  | 1.53754700  | -3.55118400 | -0.61709600 |
| C | -3.89801900 | -3.57526000 | -1.75280600 | P  | 3.06962200  | 2.31591100  | -0.62472500 |
| H | -4.13789200 | -2.56371200 | -2.09492200 | Mg | 2.95160200  | -0.79281500 | 0.58869500  |
| H | -4.56015000 | -4.28252700 | -2.26944500 | N  | 2.90722800  | -2.72003700 | -0.07297300 |
| H | -2.86886700 | -3.78858000 | -2.06591300 | N  | 5.06329100  | -1.32322300 | 1.10650600  |
| C | -1.59621000 | 5.19462100  | -1.67371000 | N  | 3.83503600  | 0.87848100  | -0.16403900 |
| H | -0.61844500 | 4.83075500  | -2.01256100 | C  | 4.23538800  | -3.32215100 | -0.15870800 |
| H | -1.76489700 | 6.17888400  | -2.13018900 | H  | 4.22944100  | -4.41766900 | -0.05541900 |
| H | -2.35270000 | 4.50254400  | -2.05508700 | H  | 4.72887700  | -3.12884200 | -1.12820600 |



|   |             |             |             |   |             |             |             |
|---|-------------|-------------|-------------|---|-------------|-------------|-------------|
| C | 1.70528000  | -3.91613900 | -2.49053300 | H | 6.63991300  | -1.14214700 | 2.54203800  |
| H | 2.30174100  | -4.83561400 | -2.58627700 | H | 5.47389600  | 0.20585600  | 2.50224900  |
| C | 5.12553200  | -2.79774600 | 0.98075300  | C | 3.89803100  | 3.57526600  | 1.75277200  |
| H | 6.16784000  | -3.13735300 | 0.84951800  | H | 4.13790800  | 2.56372100  | 2.09489200  |
| H | 4.75545500  | -3.20993500 | 1.92571700  | H | 4.56016700  | 4.28253800  | 2.26939900  |
| C | 5.29480500  | 0.81612200  | -0.17493100 | H | 2.86888200  | 3.78858700  | 2.06588800  |
| H | 5.74553600  | 1.18100700  | -1.11451800 | C | 1.59619900  | -5.19461700 | 1.67373100  |
| H | 5.74812900  | 1.42756900  | 0.62504500  | H | 0.61843200  | -4.83075400 | 2.01257700  |
| C | 5.75925700  | -0.63862000 | -0.01115900 | H | 1.76488700  | -6.17887700 | 2.13021600  |
| H | 6.85273100  | -0.68625000 | 0.12864300  | H | 2.35268500  | -4.50253500 | 2.05510800  |
| H | 5.51870000  | -1.18284300 | -0.92872700 | C | 3.51707800  | 1.32719900  | -3.25953700 |
| C | 1.64143100  | -5.29928800 | 0.14269700  | H | 2.56815000  | 0.78159400  | -3.20613600 |
| H | 2.61998400  | -5.70456600 | -0.15028400 | H | 3.72319100  | 1.53361700  | -4.31816800 |
| C | 2.44033900  | -2.77190900 | -3.20390200 | H | 4.30092600  | 0.66555800  | -2.88163000 |
| H | 3.45408400  | -2.62527100 | -2.82249500 | C | 3.66612400  | 5.12441700  | -0.23340400 |
| H | 2.50940800  | -2.98604500 | -4.27867500 | H | 2.59517500  | 5.31599300  | -0.09587000 |
| H | 1.89896000  | -1.82609100 | -3.08983300 | H | 4.21135800  | 5.87335700  | 0.35637600  |
| C | 4.04609100  | 3.71271900  | 0.23069400  | H | 3.90921300  | 5.29790300  | -1.28611900 |
| H | 5.09885700  | 3.54342100  | -0.03557800 | C | 0.56830200  | -6.26633700 | -0.37476300 |
| C | 3.43689000  | 2.64551600  | -2.47688400 | H | 0.68688600  | -6.49143900 | -1.43884200 |
| H | 4.41259400  | 3.15023300  | -2.53056300 | H | 0.62779300  | -7.21812900 | 0.16965700  |
| C | 0.33055600  | -4.13712600 | -3.14411700 | H | -0.44060000 | -5.86440900 | -0.22262700 |
| H | -0.26718500 | -3.21934900 | -3.09638100 | C | 2.36710000  | 3.55961500  | -3.09746800 |
| H | 0.45228800  | -4.40077900 | -4.20334700 | H | 2.26365700  | 4.51346900  | -2.57129100 |
| H | -0.24597300 | -4.93599000 | -2.66860000 | H | 2.61803500  | 3.78280900  | -4.14317200 |
| C | 5.57754600  | -0.87797100 | 2.41074800  | H | 1.38873700  | 3.06492700  | -3.08805200 |
| H | 4.99735000  | -1.34534400 | 3.21154700  |   |             |             |             |

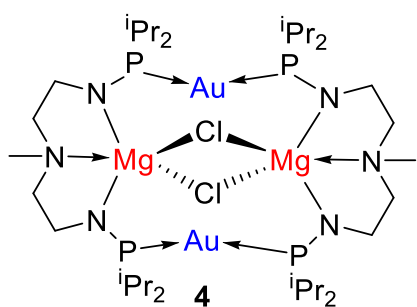

|    |             |             |             |
|----|-------------|-------------|-------------|
| Au | -3.14787200 | 0.00696700  | -0.49954200 |
| Au | 3.14838700  | -0.00719800 | -0.49888800 |
| P  | -3.08417700 | 2.38866100  | -0.50867400 |
| P  | 3.17876200  | 2.36411700  | -0.27056300 |
| P  | 3.08382300  | -2.38887200 | -0.50863100 |
| P  | -3.17859700 | -2.36436700 | -0.27042100 |
| Mg | 0.00328700  | 1.88241100  | 0.88069300  |
| Mg | -0.00396300 | -1.88150400 | 0.88072700  |
| Cl | 0.00006600  | 0.00026800  | -0.84405900 |
| N  | 1.81622900  | 2.89543700  | 0.54692200  |
| N  | -0.11247600 | 3.56778400  | 2.58856100  |
| N  | 1.72422200  | -2.91996100 | 0.30723900  |
| N  | -1.72531000 | 2.92069900  | 0.30800000  |
| N  | -1.81681500 | -2.89546400 | 0.54862000  |
| N  | 0.11352100  | -3.56669800 | 2.58895100  |
| C  | 1.79001800  | 4.25618900  | 1.09111600  |
| H  | 1.20988000  | 4.94648800  | 0.45769700  |
| H  | 2.78689400  | 4.71318400  | 1.17859900  |
| C  | -1.23322400 | 4.44770200  | 2.17147700  |
| H  | -1.02080900 | 5.49700000  | 2.43948200  |
| C  | 3.37959300  | 3.21399300  | -1.96004100 |
| H  | 4.25654900  | 2.72335700  | -2.40530200 |
| C  | 4.75155700  | 2.87264000  | 0.66473200  |
| H  | 4.73567200  | 3.96535200  | 0.76888000  |
| C  | -1.59074100 | 4.33025800  | 0.68052700  |
| H  | -2.50990200 | 4.91797000  | 0.53731100  |
| H  | -0.82529100 | 4.83486700  | 0.07039500  |
| C  | 4.75109900  | 2.25028000  | 2.06871200  |
| H  | 4.80349900  | 1.15658700  | 2.00975200  |
| H  | 3.84630700  | 2.50338800  | 2.62845600  |
| H  | 5.62025400  | 2.60036700  | 2.64061000  |
| C  | 4.65404100  | -3.07356000 | 0.31406000  |
| H  | 4.54672900  | -4.16553000 | 0.36068000  |
| C  | -3.37794600 | -3.21533200 | -1.95953100 |
| H  | -4.25427000 | -2.72478100 | -2.40612800 |
| C  | 1.20316900  | 4.23979400  | 2.50740400  |
| H  | 1.89141600  | 3.67266300  | 3.14143200  |
| H  | 1.14179500  | 5.26548200  | 2.91382300  |
| C  | 2.15714600  | 2.89963600  | -2.83368100 |
| H  | 1.25052300  | 3.34152000  | -2.40649600 |
| H  | 1.98474400  | 1.82192200  | -2.92147700 |
| H  | 2.29315200  | 3.31116800  | -3.84224700 |
| C  | -3.18292100 | 3.07541400  | -2.27940100 |
| H  | -4.09568500 | 2.62232200  | -2.69103500 |
| C  | 3.18302900  | -3.07472300 | -2.27972700 |
| H  | 4.09672500  | -2.62253800 | -2.69026900 |
| C  | -0.33824700 | 3.08286200  | 3.96344600  |
| H  | -1.27764200 | 2.52711900  | 4.00567900  |
| H  | -0.37908800 | 3.91248600  | 4.68995500  |

|   |             |             |             |   |             |             |             |
|---|-------------|-------------|-------------|---|-------------|-------------|-------------|
| H | 0.46430800  | 2.39910000  | 4.24675700  | H | 6.11195900  | 3.01642200  | -1.06170500 |
| C | 5.91801200  | -2.74446800 | -0.49576800 | H | 6.03695500  | 1.40710400  | -0.32259900 |
| H | 5.93386100  | -3.24076500 | -1.47117100 | C | -3.30302900 | 4.60477000  | -2.36978700 |
| H | 6.81168700  | -3.06898200 | 0.05296900  | H | -4.16729600 | 4.99585500  | -1.82146200 |
| H | 6.00646900  | -1.66372600 | -0.66418600 | H | -3.41395700 | 4.91170300  | -3.41822700 |
| C | -4.75236300 | -2.87210600 | 0.66359900  | H | -2.40450100 | 5.09605600  | -1.98074300 |
| H | -4.73733700 | -3.96485500 | 0.76741600  | C | -1.98525500 | 2.56763600  | -3.09428000 |
| C | -6.02056500 | -2.48167400 | -0.11201900 | H | -1.04393200 | 2.94810200  | -2.68456900 |
| H | -6.91230500 | -2.71742300 | 0.48317800  | H | -2.06455600 | 2.90448900  | -4.13620700 |
| H | -6.11124400 | -3.01434400 | -1.06414700 | H | -1.92278000 | 1.47485600  | -3.08873800 |
| H | -6.03622500 | -1.40545400 | -0.32412400 | C | 1.98672400  | -2.56484200 | -3.09529800 |
| C | -5.91866600 | 2.74077500  | -0.49688400 | H | 2.06618600  | -2.90160500 | -4.13724200 |
| H | -5.93462500 | 3.23680100  | -1.47243000 | H | 1.92608700  | -1.47196200 | -3.08958700 |
| H | -6.81296200 | 3.06442000  | 0.05135100  | H | 1.04447900  | -2.94379200 | -2.68631700 |
| H | -6.00579300 | 1.65989500  | -0.66507700 | C | -3.63511900 | -4.72881700 | -1.89241700 |
| C | -4.77068600 | 2.53342200  | 1.74739700  | H | -2.78380700 | -5.25697200 | -1.44889600 |
| H | -4.93854800 | 1.44978400  | 1.74282700  | H | -3.77717500 | -5.13150100 | -2.90408100 |
| H | -5.61627700 | 3.00443300  | 2.26527500  | H | -4.52945300 | -4.98105900 | -1.31219400 |
| H | -3.86334300 | 2.72124800  | 2.32832300  | C | 3.63625600  | 4.72761800  | -1.89401400 |
| C | -4.65546400 | 3.07155700  | 0.31345300  | H | 3.78034100  | 5.12920400  | -2.90582400 |
| H | -4.54965100 | 4.16366100  | 0.35997000  | H | 4.52928500  | 4.98075300  | -1.31217400 |
| C | 4.76934700  | -2.53536300 | 1.74796900  | H | 2.78387100  | 5.25605800  | -1.45289500 |
| H | 4.93899900  | -1.45199700 | 1.74329000  | C | -4.75263400 | -2.25017100 | 2.06776300  |
| H | 5.61386100  | -3.00766100 | 2.26643200  | H | -4.80321900 | -1.15637900 | 2.00909700  |
| H | 3.86134800  | -2.72160100 | 2.32839300  | H | -3.84896400 | -2.50489900 | 2.62858100  |
| C | 6.02063500  | 2.48321000  | -0.10994500 | H | -5.62305300 | -2.59905700 | 2.63847000  |
| H | 6.91174800  | 2.71900500  | 0.48617600  | C | -2.15444900 | -2.90207000 | -2.83206900 |

|    |             |             |             |
|----|-------------|-------------|-------------|
| H  | -1.98120500 | -1.82449900 | -2.92002400 |
| H  | -2.28974800 | -3.31381300 | -3.84064600 |
| H  | -1.24855800 | -3.34449500 | -2.40387000 |
| C  | 3.30131000  | -4.60417100 | -2.37110000 |
| H  | 2.40183300  | -5.09464900 | -1.98325200 |
| H  | 4.16460200  | -4.99670600 | -1.82226100 |
| H  | 3.41282100  | -4.91046200 | -3.41966500 |
| Cl | -0.00053800 | 0.00043100  | 2.52664400  |
| C  | 1.23132600  | -4.44904000 | 2.16886900  |
| H  | 1.01625700  | -5.49818100 | 2.43528100  |
| H  | 2.11385400  | -4.14388700 | 2.73810600  |
| C  | 1.58721800  | -4.32987600 | 0.67762400  |
| H  | 2.50488100  | -4.91934000 | 0.53208800  |
| H  | 0.81977300  | -4.83158900 | 0.06763100  |
| C  | 0.34411700  | -3.08181600 | 3.96301200  |
| H  | 1.28432500  | -2.52719900 | 4.00222000  |
| H  | 0.38622000  | -3.91135400 | 4.68955800  |
| H  | -0.45672700 | -2.39705100 | 4.24871500  |
| C  | -1.20359400 | -4.23601300 | 2.51154300  |
| H  | -1.88968200 | -3.66566300 | 3.14506200  |
| H  | -1.14392000 | -5.26081400 | 2.92053400  |
| C  | -1.79231000 | -4.25487700 | 1.09610400  |
| H  | -1.21423500 | -4.94796300 | 0.46377400  |
| H  | -2.78991000 | -4.70983300 | 1.18605100  |
| H  | -2.11413500 | 4.13893400  | 2.74126900  |
